# Supplementary material for: Common Genetic Variants Contribute to Risk of Transposition of the Great Arteries
Source: PubMed Central journal article supplement — Circ Res. 2021 Dec 10;130(2):166–80. doi: 10.1161/CIRCRESAHA.120.317107 (PMC8768504; doi:10.1161/circresaha.120.317107), 2021-12-10
Supplement: res-130-166-s002.pdf [file res-130-166-s002.pdf]

## Major Resources Table

In order to allow validation and replication of experiments, all essential research materials listed in the Methods should be included in the Major Resources Table below. Authors are encouraged to use public repositories for protocols, data, code, and other materials and provide persistent identifiers and/or links to repositories when available. Authors may add or delete rows as needed.

### Animals (in vivo studies)

| Species   | Vendor or Source                                                    | Background Strain | Sex | Persistent ID / URL                                                                                                           |
|-----------|---------------------------------------------------------------------|-------------------|-----|-------------------------------------------------------------------------------------------------------------------------------|
| Mouse     | Janvier Labs, France                                                | FVB/NRj           | M+F | <a href="https://www.janvierlabs.com/en/fiche_produit/fvb_mouse/">https://www.janvierlabs.com/en/fiche_produit/fvb_mouse/</a> |
| Mouse     | Jax                                                                 | C57BL/6J          | M,F | <a href="https://www.jax.org/strain/000664">https://www.jax.org/strain/000664</a>                                             |
| Zebrafish | ZIRC (U Oregon, Eugene, OR, USA)                                    | TL                | N/A | ZDB-GENO-990623-2                                                                                                             |
| Zebrafish | L.Zon Laboratory (Howard Hughes Medical Institute, Boston, MA, USA) | Attp2B            | N/A | ZDB-ALT-140509-2                                                                                                              |

### Genetically Modified Animals

|                        | Species   | Vendor or Source                                                    | Background Strain | Other Information | Persistent ID / URL |
|------------------------|-----------|---------------------------------------------------------------------|-------------------|-------------------|---------------------|
| <b>Parent - Male</b>   | Mouse     | Own breeding                                                        | FVB/NRj           |                   |                     |
| <b>Parent - Female</b> | Mouse     | Own breeding                                                        | FVB/NRj           |                   |                     |
| <b>Parent - Male</b>   | Zebrafish | L.Zon Laboratory (Howard Hughes Medical Institute, Boston, MA, USA) | Attp2B            |                   | ZDB-ALT-140509-2    |
| <b>Parent - Female</b> | Zebrafish | L.Zon Laboratory (Howard Hughes Medical Institute, Boston, MA, USA) | Attp2B            |                   | ZDB-ALT-140509-2    |

### Antibodies

| Target antigen | Vendor or Source | Catalog # | Working concentration | Lot # (preferred but not required) | Persistent ID / URL |
|----------------|------------------|-----------|-----------------------|------------------------------------|---------------------|
|                |                  |           |                       |                                    |                     |
|                |                  |           |                       |                                    |                     |

### DNA/cDNA Clones

| Clone Name    | Sequence | Source / Repository | Persistent ID / URL                                                         |
|---------------|----------|---------------------|-----------------------------------------------------------------------------|
| pGL4-SCP1-luc | addgene  | addgene             | <a href="https://www.addgene.org/71510/">https://www.addgene.org/71510/</a> |
|               |          |                     |                                                                             |
|               |          |                     |                                                                             |

DOI [to be added]

**Cultured Cells**

| <b>Name</b> | <b>Vendor or Source</b> | <b>Sex (F, M, or unknown)</b> | <b>Persistent ID / URL</b>             |
|-------------|-------------------------|-------------------------------|----------------------------------------|
| HL-1 cells  | Thermofisher            | F                             | Claycomb, PNAS, 1998<br>(PMID=9501201) |
|             |                         |                               |                                        |
|             |                         |                               |                                        |

**Data & Code Availability**

| <b>Description</b> | <b>Source / Repository</b> | <b>Persistent ID / URL</b> |
|--------------------|----------------------------|----------------------------|
|                    |                            |                            |
|                    |                            |                            |
|                    |                            |                            |

**Other**

| <b>Description</b>            | <b>Source / Repository</b>                                                  | <b>Persistent ID / URL</b> |
|-------------------------------|-----------------------------------------------------------------------------|----------------------------|
| E1b-RE1-mCherry-sv40pA-phiC31 | This paper                                                                  | N/A                        |
| pcDNA3.1(+) phiC31            | <a href="https://www.addgene.org/68310/">https://www.addgene.org/68310/</a> | Plasmid #68310             |
|                               |                                                                             |                            |
|                               |                                                                             |                            |
