# Supplementary material for: Common Genetic Variants Contribute to Risk of Transposition of the Great Arteries
Source: PubMed Central journal article supplement — Circ Res. 2021 Dec 10;130(2):166–80. doi: 10.1161/CIRCRESAHA.120.317107 (PMC8768504; doi:10.1161/circresaha.120.317107), 2021-12-10
Supplement: res-130-166-s003.pdf [file res-130-166-s003.pdf]

## SUPPLEMENTAL MATERIALS

Common genetic variants contribute to risk of transposition of the great arteries

## Table of Content

|                                                                                                                                                 |           |
|-------------------------------------------------------------------------------------------------------------------------------------------------|-----------|
| <b>Supplemental Online Methods</b>                                                                                                              | <b>3</b>  |
| <b>Figure S1: Genotypic principal component (PC) analysis (PCA) comparing TGA cases and controls with the 1KG populations</b>                   | <b>13</b> |
| <b>Figure S2 : Genotypic principal component (PC) analysis (PCA) within Dutch (A), German (B), French (C) and UK stratum (D)</b>                | <b>14</b> |
| <b>Figure S3 : Final genotypic principal component (PC) analysis (PCA) in the final dataset</b>                                                 | <b>15</b> |
| <b>Figure S4: QQ plot TGA GWAS discovery cohort</b>                                                                                             | <b>16</b> |
| <b>Figure S5: Manhattan plots of the genome-wide association results in the simple TGA subgroup (A) and in the complex TGA subgroup (B)</b>     | <b>17</b> |
| <b>Figure S6: SNP-based heritability estimates of the TGA case-control discovery cohort</b>                                                     | <b>18</b> |
| <b>Figure S7: Virtual 4C plot</b>                                                                                                               | <b>19</b> |
| <b>Figure S8: Assessment of RE1 -/- mice</b>                                                                                                    | <b>20</b> |
| <b>Figure S9: Haplotype frequencies RE1</b>                                                                                                     | <b>21</b> |
| <b>Table S1: Number, origin and genotyping platform for cases and controls in the discovery and replication cohorts</b>                         | <b>22</b> |
| <b>Table S2: Single nucleotide polymorphism (SNP) quality control (QC) and imputation for the discovery dataset.</b>                            | <b>24</b> |
| <b>Table S3: Sample quality control (QC) for the discovery dataset.</b>                                                                         | <b>26</b> |
| <b>Table S4: Meta-analysis results</b>                                                                                                          | <b>27</b> |
| <b>Table S5: TGA meta-analysis results for variants reported in previous genome-wide association studies (GWAS) of congenital heart disease</b> | <b>29</b> |
| <b>Table S6: Derivation and validation of TGA polygenic scores (PRS)</b>                                                                        | <b>30</b> |
| <b>Table S7: Assigned genes at GWAS loci</b>                                                                                                    | <b>32</b> |
| <b>Table S8: Phenotype description of assigned genes associated to abnormal cardiac morphology (MP:0000266/HP:0001627)</b>                      | <b>36</b> |
| <b>Table S9: Statistical details for hypothesis testing</b>                                                                                     | <b>41</b> |

## Supplemental Methods

### Case definition

Individuals with D-TGA as the primary cardiac lesion were included in this study. Patients with D-TGA and double outlet right ventricle or with univentricular heart physiology (e.g. tricuspid atresia, ventricular hypoplasia) were excluded, as were those with congenitally corrected TGA. Although genetic testing was not performed systematically in all patients, those with clinically diagnosed genetic syndromes or with extra-cardiac abnormalities suggestive of a syndromic disease (e.g. heterotaxia) were excluded.

### Study samples and genotyping

*Discovery set:* Cases were included from centers in the Netherlands, France, the United Kingdom (UK), Canada, Germany, Australia and Belgium. Except for previously genotyped cases from centers in the UK and a subset from Australia that were genotyped on the Illumina 660W array<sup>17</sup>, we genotyped all cases on the Illumina HumanOmniExpress beadchip. Controls originated from the Netherlands, France, UK and Germany and were previously genotyped in various studies (see **Table S1**).

*Replication set:* Cases from the Netherlands were additionally recruited after the discovery phase (after June 2018). Cases from the US were either recruited by collaborating centers in the US or by the Pediatric Cardiac Genomics Consortium (PCGC)<sup>82,83</sup>. Most of these were genotyped previously<sup>23</sup> (PCGC dbGaP Study Accession: phs001194.v2.p2). We verified by identity-by-state analysis that there were no overlapping cases between PCGC samples and the other US samples. Controls consisted of previously genotyped Dutch and UK controls not included in the discovery cohort.

## Genotyping quality control

Quality control (QC) was performed to exclude low quality single nucleotide polymorphisms (SNPs) and samples using PLINK 1.9 (Shaun Purcell; <http://pngu.mgh.harvard.edu/purcell/plink/>)<sup>25</sup> and in-house scripts. We excluded multiallelic and ambiguous (A/T or C/G) SNPs and those with a minor allele frequency (MAF) <0.05, call rate <0.95, Hardy-Weinberg equilibrium  $P < 10^{-6}$  for controls and  $< 10^{-10}$  for cases as well as those with significant phenotype-biased missingness ( $P < 10^{-4}$ ) after case-control merging. All SNPs were mapped to the reference strand of GRCh37. Sample level QC consisted in removing samples with genotype-phenotype sex mismatch, as well as those with a call rate <0.99 or divergent inbreeding coefficient ( $|F| > 0.2$ ). Cryptic relatedness up to the third degree (proportion identity by descent [IBD] > 0.125) was solved by keeping one sample of each pair, prioritizing cases over controls. Population outliers were removed using principal component analysis (PCA) in two steps. First, PCA was performed in the entire cohort together with individuals from the 1000 Genomes Project (1KG), removing cases and controls with the first two principal components (PC1 and PC2) deviating > 5 standard deviations (SD) from the 1KG European population mean. Second, PCA was performed at the case-control level. Because of the skewed ratios of cases and controls, we created four strata based on country of origin. Strata were as follows: 1) Dutch and Belgian cases with Dutch controls, 2) German cases and German controls, 3) French and French-Canadian cases with French controls, and 4) UK, Australian and English-Canadian cases with UK controls. PCA within each stratum was then performed. Individuals were projected along the first 4 PCs and individuals clearly deviating from the group mean were excluded. Subsequently, within each stratum, every case was matched to 3 controls, based on identity by state. After this step, all cases and controls were merged back into one dataset and PCs were recalculated.

## Genotype imputation

Genome-wide imputation was performed using Eagle2 phasing, Minimac3 and the Haplotype reference consortium (HRCr1.1) panel implemented on the Michigan Imputation Server<sup>41</sup>. After imputation, only SNPs with MAF >0.05 and a Minimac3  $R^2 > 0.8$  were included in association analysis.

## Association analysis

The association of D-TGA with alternate allele dosage was assessed using logistic regression assuming an additive genetic model. Allelic dosage was used for both directly genotyped SNPs (0,1,2) and imputed ones (0-2). In the discovery set we adjusted the analysis for sex and the first five PCs. Although the replication set was also restricted to samples of European descent, US cases showed more ancestral diversity and therefore we included the first ten PCs and sex as covariates in the replication. P-values were corrected for the genomic inflation factor ( $\lambda$ ) when  $> 1$ .

The meta-analysis of the discovery and the replication set was performed using an inverse variance weighted fixed effect model, implemented in METAL<sup>84</sup>.

After performing a meta-analysis with the results from the discovery and replication set, we tested at each genome-wide locus the number of independent signals using conditional analysis with GCTA-COJO<sup>85</sup>, conditioning on the lead SNP.

## Previously associated SNPs CHD

We performed a look-up of all SNPs previously associated with any CHD in the present D-TGA case-control meta-analysis GWAS. We only selected for SNPs that reached genome-wide significance ( $P < 5 \times 10^{-8}$ ) in the previously published CHD GWAS studies.

## SNP heritability

Prior to estimating SNP-heritability, post-imputation QC was performed using hard call genotypes (genotype probability > 0.9) and excluding SNPs with missing rate > 1%, Hardy-Weinberg  $P < 0.05$  and phenotype-biased missingness  $P < 0.05$ , as well as samples with missing rate > 1% and one of a pair of cryptic distantly related samples (proportion IBD > 0.05). The Linkage Disequilibrium Adjusted Kinship (LDAK) software tool<sup>86</sup> was used to generate a genetic relationship matrix (GRM) with correction for PCs 1-20 and sex as covariates.

Because D-TGA cases were over-sampled in this cohort, compared to their population prevalence, SNP-heritability estimates are given on a liability scale ( $\hat{h}_{SNP(l)}^2$ )

To assess the robustness of heritability estimates from Phenotype-Correlation-Genotype-Correlation approach, we also estimated SNP-heritability using relatedness restricted maximum likelihood (REML), implemented in LDAK and GCTA (GREML)<sup>87</sup>. We assumed a prevalence of 0.03% and tested for the effect of prevalence by additionally using a range of prevalence (0.01%-0.06%) to calculate  $\hat{h}_{SNP(l)}^2$ . To exclude potential bias due to genotyping artefacts or population stratification, we also calculated  $\hat{h}_{SNP(l)}^2$  in a subset of only Dutch cases and controls that were genotyped on the same platform (Illumina HumanOmniExpress).

## Polygenic risk score

A Gibbs sampler with various fractions ( $\rho = 1, 0.3, 0.1, 0.03, 0.01, 0.003, 0.001, 0.0003, 0.0001$ ) was used to generate genome-wide weights with and without the regions harboring genome-wide significant signals. Alternatively, traditional P-value thresholding and  $R^2$  pruning was also used with P-values of  $5 \times 10^{-8}$ ,  $1 \times 10^{-5}$ ,  $1 \times 10^{-4}$  and  $1 \times 10^{-3}$  and  $R^2$  of 0.8, 0.5, 0.2, 0.1 and 0.05. The resulting 38 models were used to calculate polygenic risk score (PRS) in the replication cohort in PLINK 1.9<sup>25</sup> and association of PRS with

D-TGA was assessed using logistic regression in R<sup>88</sup>, correcting for sex. The best model was selected based on the maximal C-statistic, as recently performed<sup>89</sup>. No other covariate was used to avoid model overfitting.

## Annotation of loci

Summary statistics from the meta-analysis were uploaded to the Functional Mapping and Annotation (FUMA) platform<sup>90</sup> to define all independent genomic risk loci with a p-value of the lead SNP  $<1 \times 10^{-5}$ . The borders of the genomic risk locus were determined by identifying all SNPs with an  $r^2 \geq 0.5$  with the lead SNP and that showed an association p-value of  $<10^{-3}$ .

Genes were assigned to genomic risk loci by means of eQTL (expression quantitative trait locus) mapping as implemented in FUMA<sup>90</sup>. The analysis was restricted to cis-eQTL effects (maximum distance 1 Mb). Data was used from all tissues in the Genotype-Tissue expression dataset (V8)<sup>91</sup> and two blood eQTL datasets<sup>92,93</sup>. The threshold for a significant cis-eQTL was set to a false discovery rate (FDR)  $< 0.05$ . In addition, because the likelihood of a single-nucleotide polymorphism (SNP) acting on its target gene is higher when they are in close proximity in a three-dimensional space, we identified all genes within the same topologically associated domain (TAD) as the risk loci. Genomic coordinates of TADs were estimated from human induced pluripotent stem cells-derived cardiomyocytes (iPSC-CMs) promoter capture Hi-C data<sup>80</sup>.

We subsequently annotated the above-assigned genes based on their known function in the mammalian heart. We used the mammalian and human phenotype ontology terms associated with abnormal heart morphology (MP:0000266 and HP:0001627 respectively,  $n=2,785$  genes). This search was done in the Human - Mouse: Disease Connection database (<http://www.informatics.jax.org/humanDisease.shtml>) which integrates mouse and human genetic phenotypes from the Mouse Genome Informatics database,

the National Center for Biotechnology Information and Online Mendelian Inheritance in Man. In addition, we also indicated for each gene if it was present in one of the published curated CHD candidate lists<sup>46-48</sup>.

For the overlap of the risk loci with the EMERGE dataset<sup>94</sup>, EMERGE peaks were called where the absolute EMERGE prediction read-out exceeded 0.08, which corresponds to the top 100,000 predicted signals genome-wide.

### Virtual 4C data

We used previously generated Hi-C data from H9 human embryonic stem cell (hESC) cardiomyocytes at several stages of differentiation, i.e. day 5 (cardiac mesoderm), day 15 (primitive cardiomyocytes) and day 80 (ventricular cardiomyocytes)<sup>95</sup>. This data was taken from the 4D Nucleome Data Portal (<https://data.4dnucleome.org/publications/1037111f-92d5-48a4-aaf3-9952a39920f2/#expsets-table>). In addition, we used Hi-C data from adult cardiac samples<sup>43</sup>. Detailed description of the transformation of Hi-C data into viewpoint centered Virtual 4C (V4C) profiles can be found elsewhere<sup>43</sup>. The V4C profiles were plotted with R version 4.0.3, using ggplot2. Reads were extracted from .hic files using strawr (<https://github.com/aidenlab/straw/blob/master/R/R/strawr.R>) in a 1Mb region around the set anchor point (the EMERGE enhancer region: chr3:55,605,229-55,607,027; GRCh37, lifted over to hg38 using <https://genome.ucsc.edu/cgi-bin/hgLiftOver>). All .hic files are aligned to hg38, binned at a 1kb resolution and normalised using Knight-Ruiz normalisation. The V4C profiles were then smoothed using a uniform rolling mean with a 5kb window.



## Haplotype constructions

Haplotypes were constructed using the LDhap module within the LDlink web-based tool<sup>96</sup>. We uploaded the seven SNPs within the RE1 region (chr3:55,605,229-55,607,027; GRCh37) and used the 1000 Genomes Project European sub-population as the reference population.

## Motif-based sequence analysis

Motif-based sequence analysis was done using Find Individual Motif Occurrences (FIMO)<sup>97</sup> by scanning for specific transcription factor (TF) motifs matching sequences within RE1 (chr3:55,605,229-55,607,027; GRCh37). We used relevant cardiac, bone morphogenetic proteins (BMP) and Wingless (Wnt) signaling pathway TF motifs obtained from JASPAR<sup>98</sup> and applied the default threshold  $P < 1 \times 10^{-4}$  for detection in FIMO.

## Generating and cloning of reporter constructs

Reporter constructs for the three major haplotype were generated by amplifying RE1 from genomic DNA of homozygous carriers using Q5 Hot Start High-Fidelity DNA Polymerase (NEB; M0493S) and primers GGGGACAAGTTTGTACAAAAAAGCAGGCTTGTCAAGGTCACACAGCCTCTA (forward) and GGGGACCACTTTGTACAAGAAAGCTGGGD-TGAATCGGGTCTGTTTTGTGCACAA (reverse). The amplified fragments were cloned in the pGL4-SCP1-luc vector using Gateway Cloning according to manufacturer's protocol (ThermoFischer Scientific; 11789-020/11791-020) and confirmed by Sanger sequencing. HL-1 cells (a mouse atrial cardiomyocyte tumor lineage cell line<sup>40</sup>, RRID: CVCL\_0303 {#4336}) were grown in 24-well plates ( $2.5 \times 10^6$  cells/plate) in Claycomb medium (Sigma-Aldrich, 51800C) supplemented with chemically defined HL-1 FBS substitute (Lonza, 77227), Glutamax (ThermoFisher Scientific, 35050-061) and Pen/Strep (ThermoFisher Scientific, 15070-063). HL1 cells were transfected with reporter plasmid DNA using Lipofectamine 3000 (ThermoFisher Scientific, L3000-015). 500ng plasmid DNA was

transfected according to manufacturer's protocol. Culture medium was refreshed 6 hours after transfection and cells were lysed 48 hours after transfection using Renilla luciferase assay lysis buffer (Promega, E291A-C). Transfection was repeated three times and performed in duplicate.

### Luciferase reporter assay *in vitro*

Luciferase activity measurements were performed in duplicate using a GloMax Explorer (Promega, GM3500) with 100 $\mu$ l D-Luciferin (p.j.k., 102111). Measurements were performed by a 1 second delay and 5 seconds of measurement per sample. Relative luciferase activity of reporter plasmids was normalized to luciferase activity of the empty pGL4-SCP1-luc vector.

### Zebrafish experiments

Zebrafish experiments were approved by the Animal Experimentation Committee of the Royal Netherlands Academy of Arts and Sciences. Zebrafish (*Danio rerio*) were kept in standard laboratory conditions<sup>99</sup>. Wildtype TL (Tübingen Long Fin) and attP2B<sup>100</sup> were used in this study. The amplified fragments from RE1 were cloned in front of the E1b promoter of a custom vector containing an E1b-mCherry-sv40pA cassette and an attB landing site for phiC31-mediated targeted injection. The constructs were then microinjected in attP2B 1-cell embryos coming at a final concentration of 20 ng/ $\mu$ l in the presence of 25 ng/ $\mu$ l PhiC31 recombinase RNA. Embryos were kept at 28.5°C in E3 medium and first selected on heart-specific GFP expression, which is a reporter for the presence of the transgenic attP site. Microinjection using an attP2B landing site zebrafish line in presence of PhiC31 recombinase allows accurate assessment of any variation in activity level, as recombination leading to reporter transcription is limited to a single copy of the expression cassette, in an identical genomic location and orientation for all tested zebrafish larvae. RE1-driven mCherry expression was assessed at 2dpf on a Leica MZFLIII fluorescence stereomicroscope (Leica Microsystems GmbH). Confocal Imaging was

performed on a Leica SP8 confocal microscope (Leica Microsystems). Zebrafish embryos in which the microinjection procedure resulted in gross, unspecific developmental defects were excluded from the analysis. At the time of scoring, sex was not determined in zebrafish.

### Deletion of the GWAS locus in mice

Animal care and experiments were in accordance with guidelines from the European Union, the Dutch government and the Amsterdam University Medical Centers and were approved by the Animal Experimental Committee of the Amsterdam University Medical Centers.

*Genetically modified mouse lines:* Two independent lines ( $RE1A^{-/-}$ , and  $RE1C^{-/-}$ ) were generated using CRISPR/Cas9 genome editing to rule out off-target effects. Guide RNA constructs were designed using ZiFiT Targeter (Sander, J. D. 2010). The target sequences were the following: guide 1 (GGGTGGATTAACACTGTGGA), guide 2 (GGACACGGGGCTGCAGGAT), guide 3 (GGCCAGCACTATTTCCAAGA). The  $RE1A$  deletion was generated using guides 1 and 3 and  $RE1C$  with 1 and 2. The sgRNA constructs were transcribed *in vitro* using MEGAshortscript T7 and mMessage Machine T7 transcription kit according to manufacturer instructions (ThermoFisher Scientific). One-cell FVB/NRj zygotes were microinjected with 10 ng/ $\mu$ l each sgRNA and 25 ng/ $\mu$ l Cas9 mRNA to generate mouse founders. All mice were maintained on a FVB/NJ background commercially obtained from Jackson laboratory (stock number 100800). No animals were excluded from analyses and sex was not determined of each individual embryo. Chi-square test was used to examine Mendelian ratios for both lines.

*In situ hybridization:* E10.5 embryos were fixed overnight in 4% paraformaldehyde in PBS and dehydrated in a graded ethanol series. Whole-mount non-radioactive *in situ* hybridization analysis was

performed as previously described<sup>101</sup> using mRNA probes for the detection of *Wnt5a*. Embryos were analyzed using a Leica MZ75 upright microscope and photographed with a Leica DFC290 Digital Camera.

**RNA isolation, cDNA synthesis and qPCR:** Total RNA from excised E9.5 hearts and surrounding tissue was isolated and DNase-treated using ReliaPrep RNA Tissue Miniprep System (Promega). To generate cDNA, 500ng of total RNA were used as input for the Superscript II system (Thermo Fisher Scientific) with oligo dT primers (6.25  $\mu$ M). Transcript levels of candidate target genes were determined by qPCR using a LightCycler 2.0 Real-Time PCR system (Roche Life Science, Indianapolis, IN). Primer sets are listed in the table below. Each reaction was performed with LightCycler 480 SYBR Green I Master mix (Roche), primers (1  $\mu$ M) and cDNA (equivalent to 5 ng RNA). The amplification protocol consisted of 5 min 95 °C followed by 45 cycles of 10 sec 95°C, 20 sec 60°C and 20 sec 72°C. Data was analyzed using LinRegPCR<sup>102</sup>. Expression levels of *Wnt5a* and surrounding genes in wildtype mice was corrected using two reference genes per experiment (*Ppia* and *Rpl32*)<sup>103</sup>. Expression levels of *Wnt5a* and surrounding genes in *RE1A*<sup>-/-</sup>, and *RE1C*<sup>-/-</sup> mice were first normalized to wildtype levels and comparison in expression levels between wildtype and mutant mice was performed using Welch's ANOVA test or Kruskal-Wallis test depending on normality of the data. Details about statistical analysis are included in **Table S9**.

The experimenter was blind to genotype until after the experiments (in situ hybridization and qPCR) were completed and data was analyzed.

| Gene            | Forward primer               | Reverse primer                    |
|-----------------|------------------------------|-----------------------------------|
| <b>Wnt5a</b>    | F 5'-3' CTCCTTCGCCAGGTTGTTAT | R 5'-3' CCTTGAGAAAGTCCTGCCAGTT    |
| <b>Erc2</b>     | F 5'-3' CTGGGAGGTCACAGCATTCC | R 5'-3'<br>ACAGCCCTCAAAACAAAACTGG |
| <b>Cacna2d3</b> | F 5'-3' CCACAGGGAACATTGCTTGC | R 5'-3' CTGTCCACCACCACCATGAA      |
| <b>Lrtm1</b>    | F 5'-3' GTGACTGCCACTTACTGGGT | R 5'-3' CAGGGTTGGTACAGTTCGTGA     |
| <b>Hprt</b>     | F 5'-3' TGTTGGATATGCCCTTGACT | R 5'-3' GATTCAACTTGCCTCATCT       |

Figure S1 : Genotypic principal component (PC) analysis (PCA) comparing TGA cases and controls with the 1KG populations

Plotted are PC1 (x-axis) vs PC2 (y-axis).

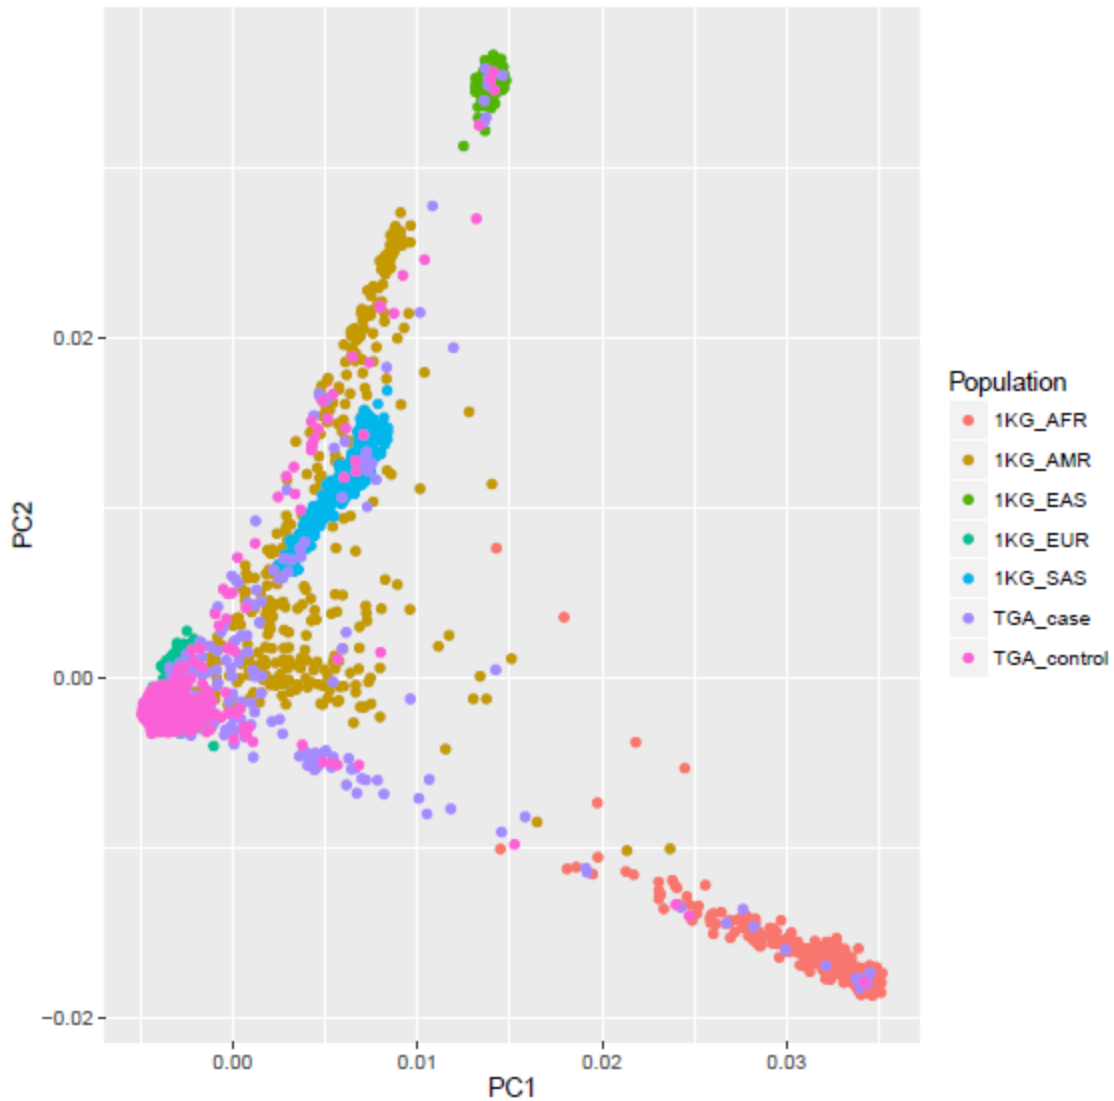

Abbreviations : 1KG: 1000 Genomes ; AFR, African; AMR, Admixed American; EAS, East Asian; EUR, European; SAS, South Asian.

Figure S2 : Genotypic principal component (PC) analysis (PCA) within Dutch (A), German (B), French (C) and UK stratum (D).

Plotted are PC1 (x-axis) vs PC2 (y-axis). Red rectangles delineate the boundaries of included samples.

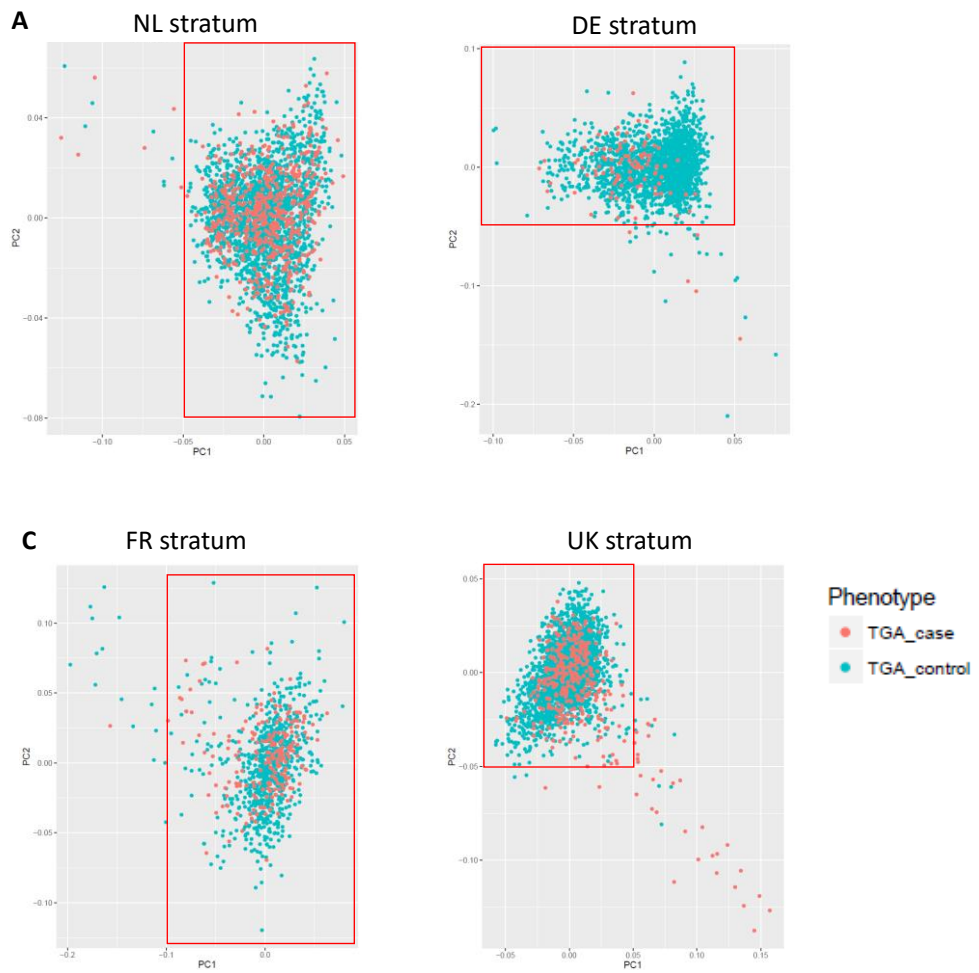

Figure S3 : Final genotypic principal component (PC) analysis (PCA) in the final dataset.

Final dataset included 1,094 cases and 3,282 matched controls. Plotted are PC1 (x-axis) vs PC2 (y-axis).

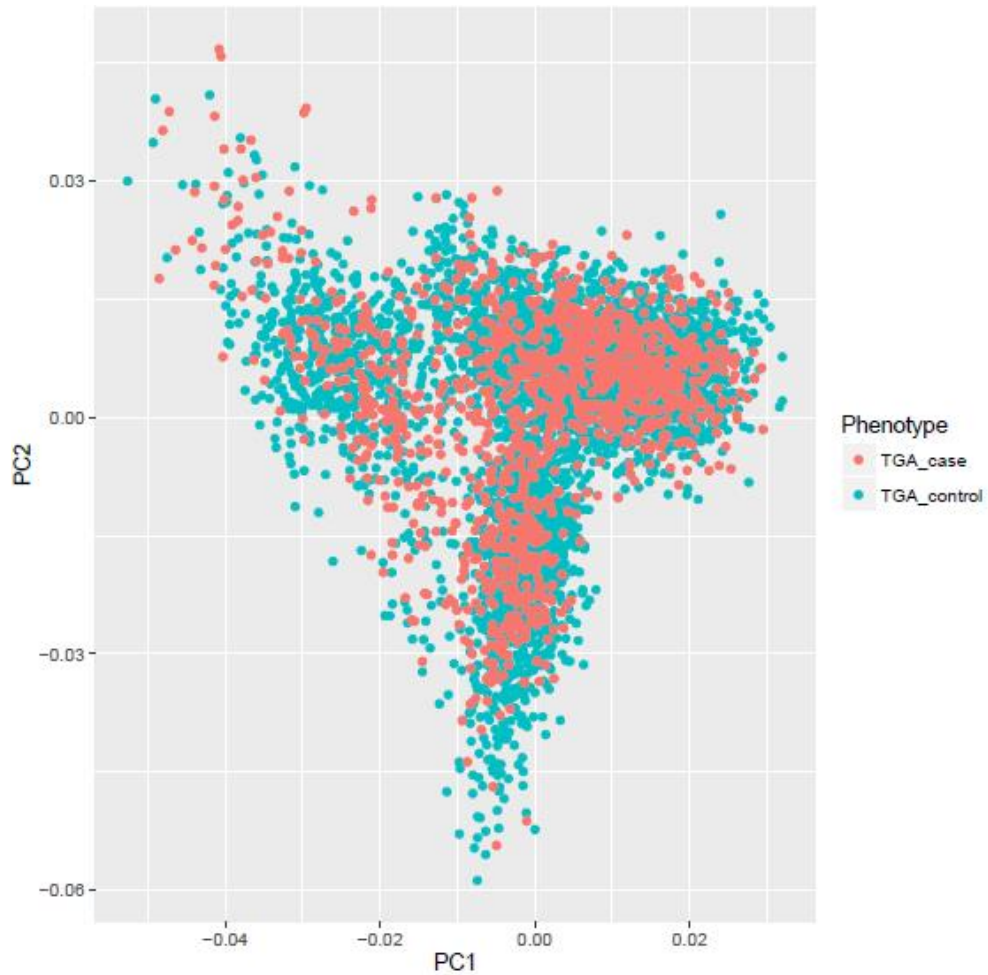

Figure S4: QQ plot TGA GWAS discovery cohort  
Corresponding  $\lambda=1.03$

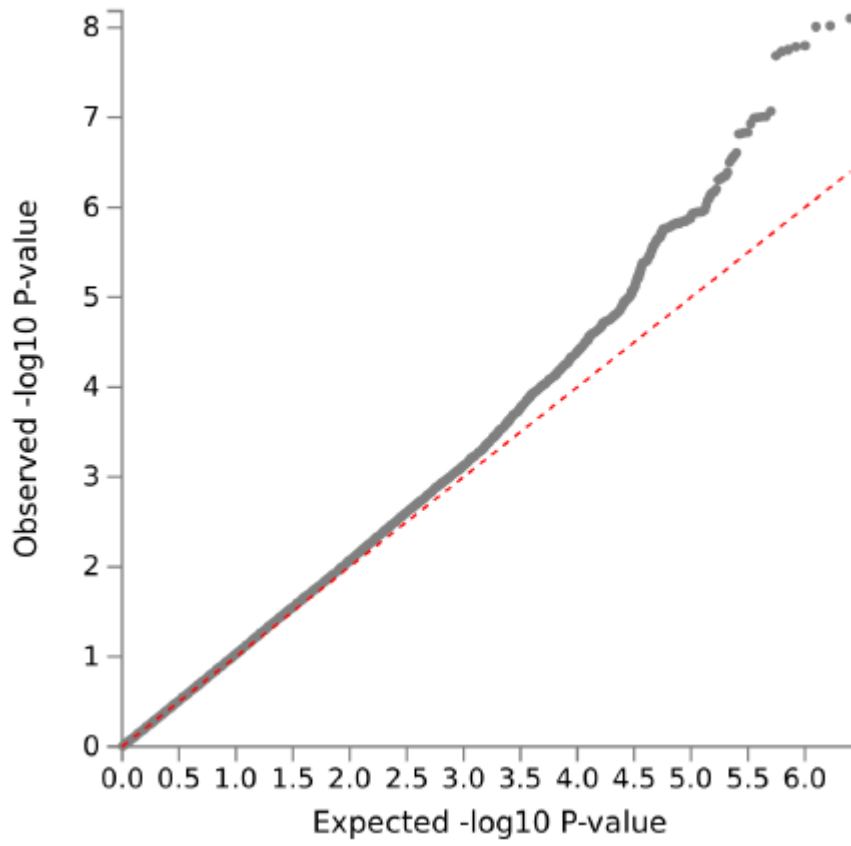



Figure S5: Manhattan plots of the genome-wide association results in the simple TGA subgroup consisting of 841 cases and 2,523 controls (A) and in the complex TGA subgroup consisting of 396 cases and 1,188 controls (B).

P-values of all tested SNPs on a  $-\log_{10}$  scale from the logistic regression analysis in the meta-analysis of the discovery and replication cohort. Dashed line represent genome-wide significance thresholds of  $5 \times 10^{-8}$ .

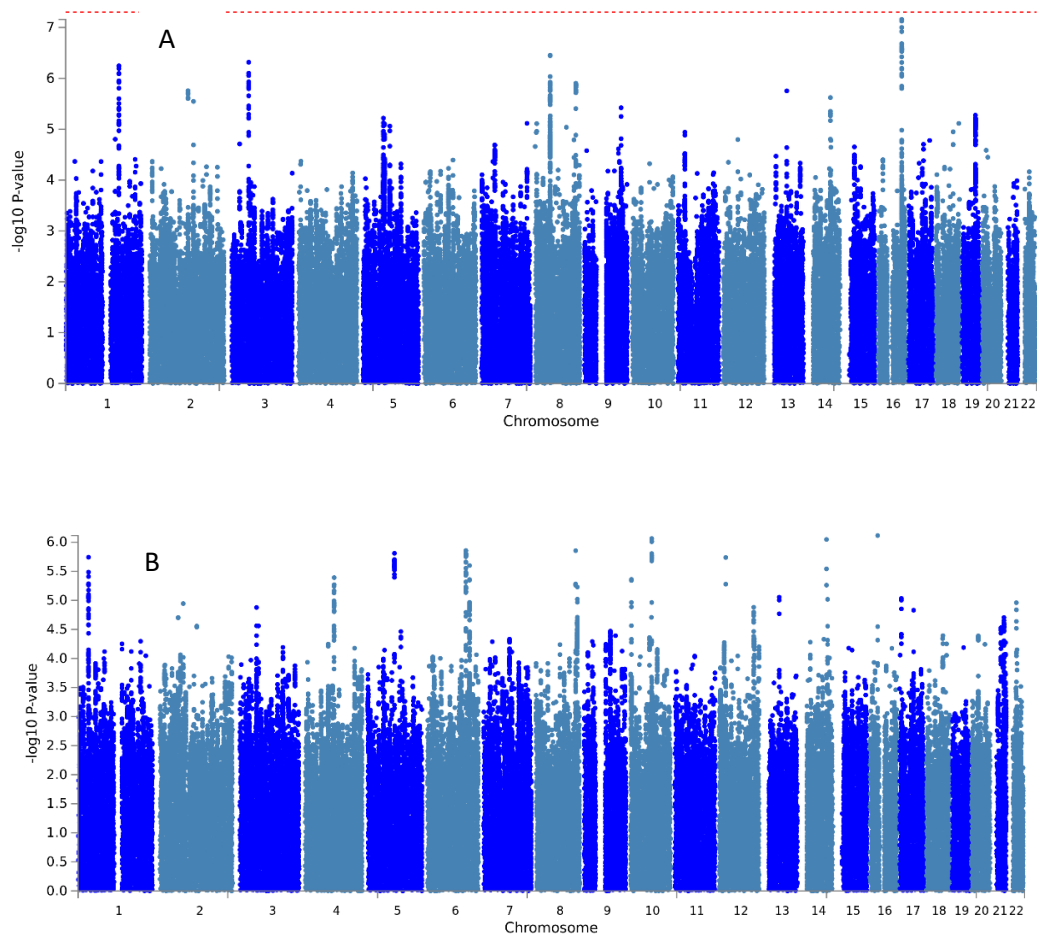

### Figure S6: SNP-based heritability estimates of the TGA case-control discovery cohort

Estimates and 95% confidence intervals (CI) for different methods and varying prevalence. Estimates are calculated for the entire discovery cohort ('All'), as well as for a Dutch subset ('Dutch') of TGA cases and controls.  $\hat{h}_{SNP(l)}^2$ : SNP-based heritability estimates on a liability scale.

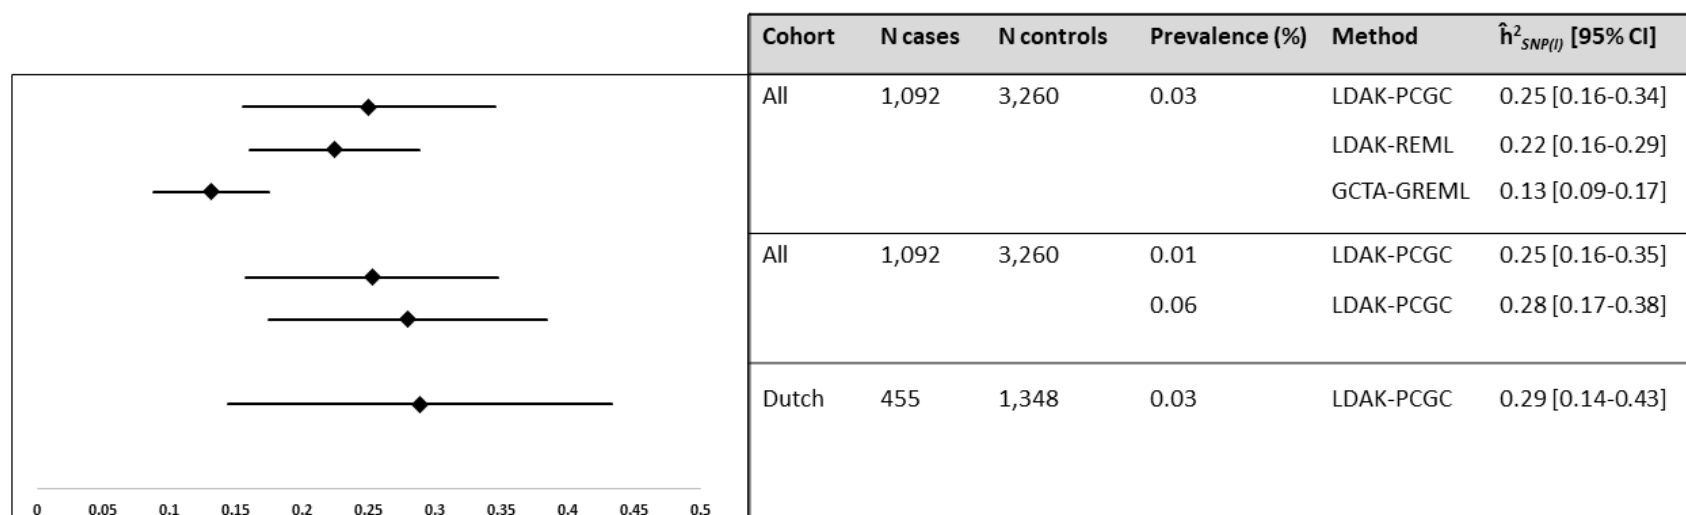

Abbreviations: CI, confidence interval; GCTA, Genome-wide complex trait analysis; GREML genomic relatedness restricted maximum likelihood; LDAK, linkage disequilibrium adjusted kinship; PCGC, Phenotype-Correlation-Genotype-Correlation

Figure S7: Virtual 4C contact profiles

V4Cs for differentiating H9 cells and primary human heart at RE1 (black vertical line, chr3:55571201–55572999, hg38). The grey highlighted region represent the location of the *WNT5A* gene.

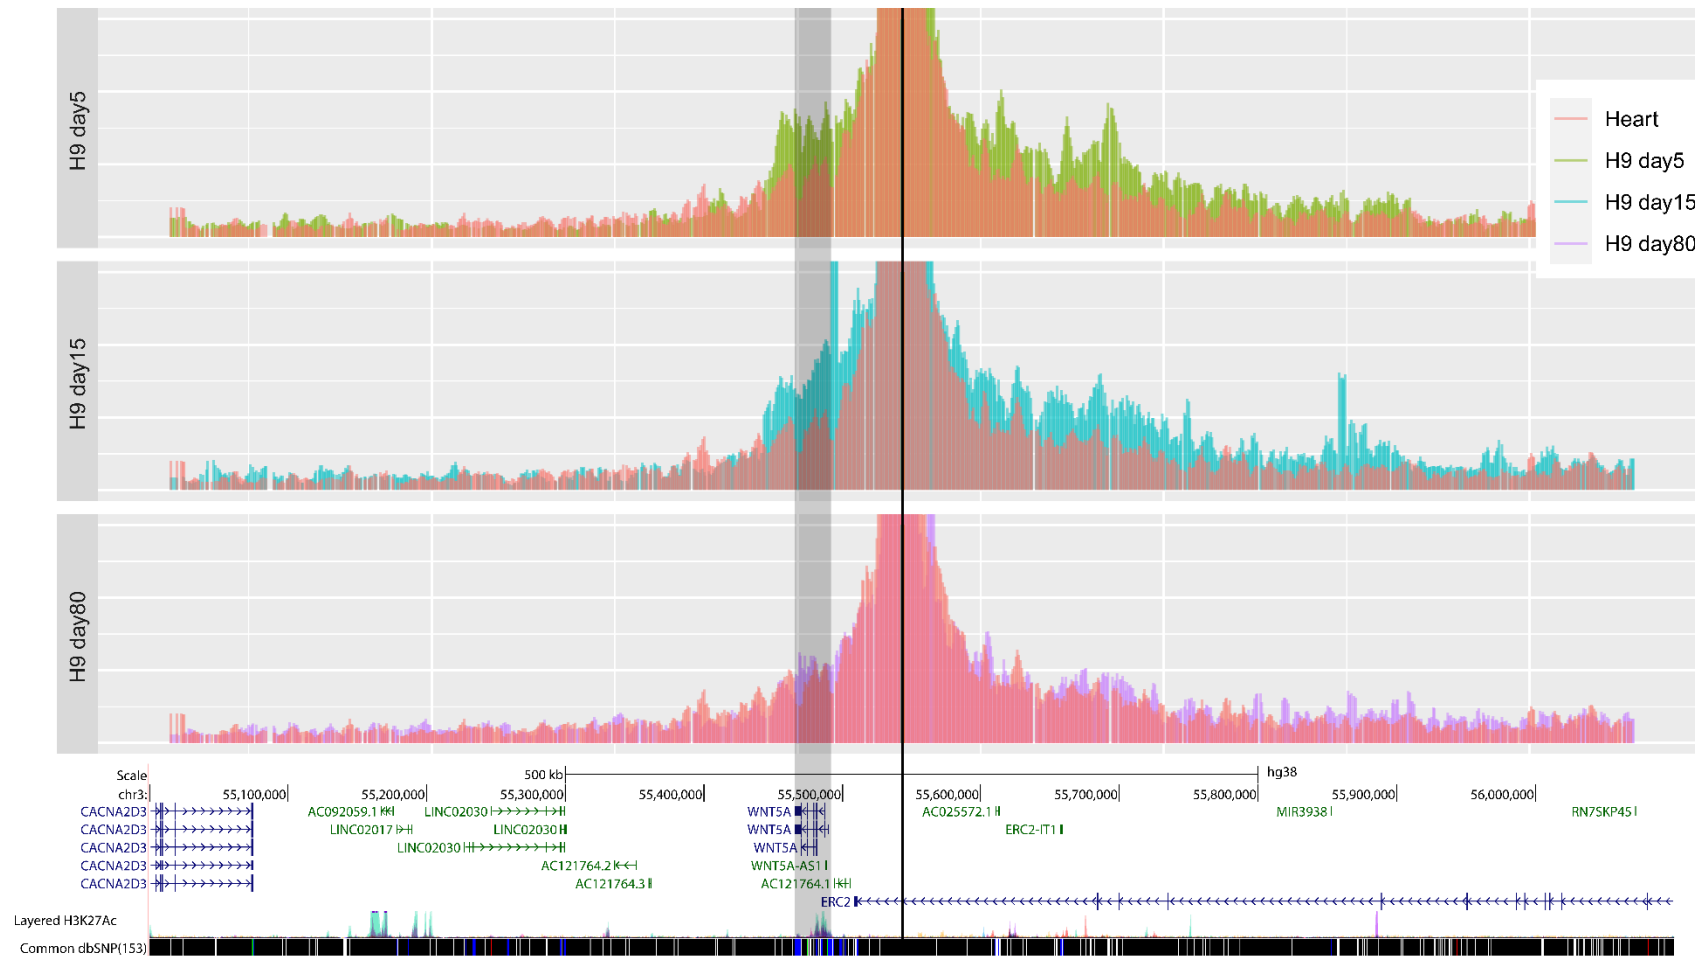

## Figure S8: Assessment of RE1<sup>-/-</sup> mice

Mouse homologues region of the 3p14.3 locus showing overlap with a strong EMERGE signal (**A**). Two independent mouse deletion lines were generated, RE1A<sup>-/-</sup> and RE1C<sup>-/-</sup>, of 50Kb and 43Kb size respectively. Expression levels of *Wnt5a* and surrounding genes in E9.5 cardiac tissue were assessed by qPCR in WT (n=7, corrected with *Ppia* and *Rpl32*), RE1A<sup>-/-</sup> and RE1C<sup>-/-</sup> mice (normalized within each litter) (**B,C,D**). RE1A<sup>-/-</sup> and RE1C<sup>-/-</sup> mice were born at normal Mendelian ratios and in situ hybridization in E10.5 WT (n=5) and RE1A<sup>-/-</sup> (n=6) mice showed no difference in *Wnt5a* transcript expression (**E**).

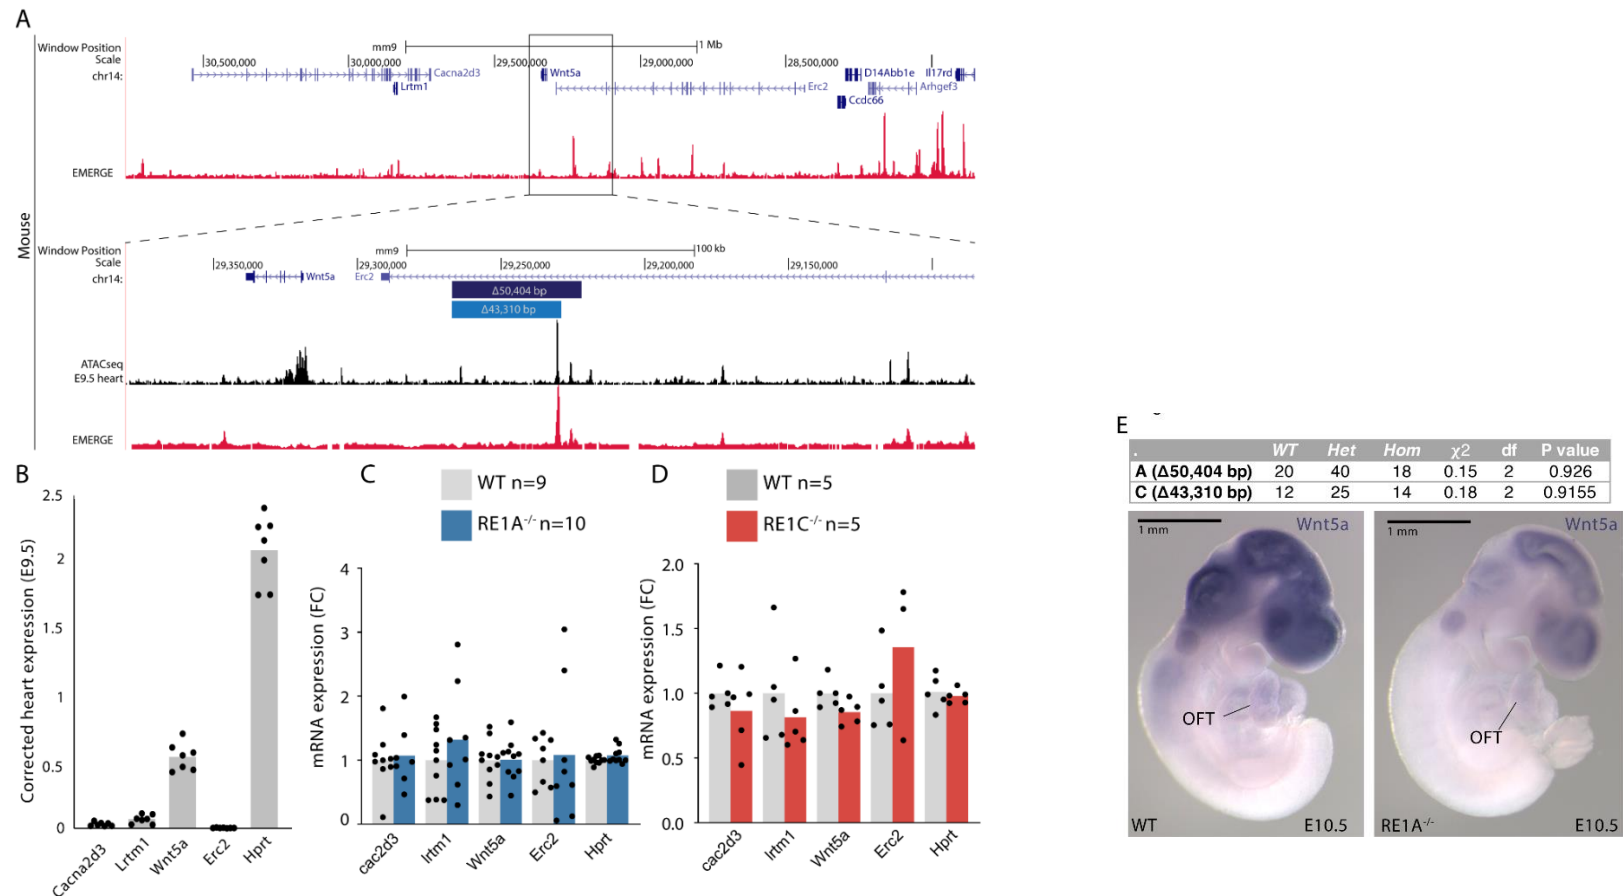

Abbreviations: bp, base pairs; df, degrees of freedom; FC, fold change; Het, heterozygous; Hom, homozygous; OFT, outflow tract; WT, wild-type

### Figure S9: Haplotype frequencies RE1

Haplotypes of the seven SNPs within RE1 constructed using the LDhap module within the LDlink web-based tool<sup>96</sup>. Within the dashed box are the three major haplotypes that were tested.

| RS Number                  | Position (GRCh37) | Allele Frequencies | Haplotypes               |           |           |        |        |        |        |        |
|----------------------------|-------------------|--------------------|--------------------------|-----------|-----------|--------|--------|--------|--------|--------|
| rs6765264                  | chr3:55605361     | C=0.735, T=0.265   | C                        | T         | C         | C      | T      | C      | C      | T      |
| rs55856144                 | chr3:55606087     | G=0.932, A=0.068   | G                        | G         | G         | G      | A      | G      | G      | G      |
| rs3907611                  | chr3:55606108     | G=0.915, A=0.085   | G                        | G         | G         | A      | G      | G      | G      | G      |
| rs6783998                  | chr3:55606476     | T=0.65, C=0.35     | T                        | C         | T         | T      | C      | C      | C      | C      |
| rs79492708                 | chr3:55606642     | C=0.852, T=0.148   | C                        | C         | T         | C      | C      | C      | C      | C      |
| rs76152725                 | chr3:55606693     | C=0.817, T=0.183   | C                        | T         | C         | C      | C      | C      | C      | C      |
| rs6769087                  | chr3:55606773     | C=0.777, T=0.223   | C                        | T         | C         | C      | C      | C      | T      | T      |
| <b>Haplotype Count</b>     |                   |                    | 419                      | 182       | 149       | 85     | 68     | 60     | 24     | 16     |
| <b>Haplotype Frequency</b> |                   |                    | 0.4165                   | 0.1809    | 0.1481    | 0.0845 | 0.0676 | 0.0596 | 0.0239 | 0.0159 |
|                            |                   |                    | <b>1.</b>                | <b>2.</b> | <b>3.</b> |        |        |        |        |        |
|                            |                   |                    | <b>Tested haplotypes</b> |           |           |        |        |        |        |        |

Table S1: Number, origin and genotyping platform for cases and controls in the discovery and replication cohorts.

Discovery cohort

Cases (n=1,307)

| Country         | N of samples | Phenotype                 | Genotyping platform                              |
|-----------------|--------------|---------------------------|--------------------------------------------------|
| The Netherlands | 459          | 254 Simple<br>205 Complex | Illumina HumanOmniExpress*                       |
| France          | 276          | 242 Simple<br>34 Complex  | Illumina HumanOmniExpress*                       |
| United Kingdom  | 177          | 177 Simple                | Illumina Human660K <sup>1</sup>                  |
| Canada          | 174          | 110 Simple<br>64 Complex  | Illumina HumanOmniExpress*                       |
| Germany         | 110          | 60 Simple<br>50 Complex   | Illumina HumanOmniExpress*                       |
| Australia       | 78           | 42 Simple<br>36 Complex   | Illumina HumanOmniExpress*<br>Illumina Human660K |
| Belgium         | 33           | 21 Simple<br>12 Complex   | Illumina HumanOmniExpress*                       |

Controls (n=9,705)

| Country         | N of samples | Study                            | Genotyping platform                                 |
|-----------------|--------------|----------------------------------|-----------------------------------------------------|
| The Netherlands | 2,262        | Project MinE- cNL4 <sup>2</sup>  | Illumina HumanOmniExpress                           |
| France          | 856          | The SU.VI.MAX Study <sup>3</sup> | Illumina Human660K                                  |
| United Kingdom  | 2,501        | WTCCC2- NBS <sup>4</sup>         | Illumina HumanOmni1M                                |
| Germany         | 4,086        | KORA F3 <sup>5</sup>             | Illumina HumanOmniExpress<br>Illumina HumanOmni2.5M |

## Replication cohort

## Cases (n=248)

| Country                  | N of samples | Phenotype                | Genotyping platform                                                                              |
|--------------------------|--------------|--------------------------|--------------------------------------------------------------------------------------------------|
| The Netherlands (CONCOR) | 45           | 30 Simple<br>15 Complex  | Illumina HumanOmniExpress*                                                                       |
| USA                      | 203          | 120 Simple<br>83 Complex | Illumina 550/610<br>Illumina HumanOmni2.5M<br>Illumina HumanOmni1M<br>Illumina HumanOmniExpress* |

## Controls (n=3,318)

| Country         | N of samples | Study                           | Genotyping platform    |
|-----------------|--------------|---------------------------------|------------------------|
| The Netherlands | 619          | Project MinE- cNL3 <sup>2</sup> | Illumina HumanOmni2.5M |
| United Kingdom  | 2,699        | WTCCC2- 1958BC <sup>4</sup>     | Illumina HumanOmni1M   |

\* = samples genotyped in this study

<sup>1</sup>Cordell, H. J. et al. Genome-wide association study of multiple congenital heart disease phenotypes identifies a susceptibility locus for atrial septal defect at chromosome 4p16. *Nat. Genet.* 45, 822–824 (2013); <sup>2</sup>Van Rheenen, W. et al. Genome-wide association analyses identify new risk variants and the genetic architecture of amyotrophic lateral sclerosis. *Nat. Genet.* 48, 1043–1048 (2016); <sup>3</sup>Hercberg, S. et al. The SU.VI.MAX study: A randomized, placebo-controlled trial of the health effects of antioxidant vitamins and minerals. *Arch. Intern. Med.* 164, 2335–2342 (2004); <sup>4</sup>UK IBD Genetics Consortium et al. Genome-wide association study of ulcerative colitis identifies three new susceptibility loci, including the HNF4A region. *Nat Genet.* 41, 1330-4 (2009).; <sup>5</sup>Holle, R. et al. KORA - A Research Platform for Population Based Health Research. *Gesundheitswesen* 2005; 67: 19-25

Table S2: Single nucleotide polymorphism (SNP) quality control (QC) and imputation for the discovery dataset.

Cohorts 1 to 4 represent cases genotyped on the Illumina HumanOmniExpress array in 4 different batches. Cohort 5 represents previously genotyped cases from the United Kingdom.

| SNP QC step                                                                                  | Cases    |          |          |          |          | Controls |         |         |          |
|----------------------------------------------------------------------------------------------|----------|----------|----------|----------|----------|----------|---------|---------|----------|
|                                                                                              | Cohort 1 | Cohort 2 | Cohort 3 | Cohort 4 | Cohort 5 | Dutch    | German  | French  | UK       |
| <b>Start</b>                                                                                 | 713,014  | 713,014  | 713,014  | 713,599  | 527,234  | 719,665  | 706,003 | 557,053 | 934,848  |
| <b>Re-mapping to hg 19†</b>                                                                  | -        | -        | -        | -2,804   | -73      | -        | -       | -       | -429,516 |
| <b>SNPs with known mapping problems‡</b>                                                     | -0       | -0       | -0       | -72      | -21      | -203     | -236    | -27     | -128     |
| <b>Non-autosomal SNPs</b>                                                                    | -19,963  | -19,963  | -19,963  | -17,551  | -12,289  | -20,674  | -18,114 | -13,381 | -39,806  |
| <b>Call rate &lt; 95%</b>                                                                    | -2,282   | -11,708  | -14,369  | -6,920   | -963     | -9,937   | -15,514 | -3,289  | -0       |
| <b>HWE <math>P &lt; 10^{-10}</math> in cases and <math>P &lt; 10^{-6}</math> in controls</b> | -11      | -14      | -0       | -1       | -3       | -3,087   | -581    | -434    | -964     |
| <b>MAF &lt; 1%</b>                                                                           | -70,758  | -60,565  | -46,443  | -60,675  | -1,277   | -71,372  | -70,074 | -22,132 | -564     |
| <b>Ambiguous</b>                                                                             | -1,821   | -1,774   | -1,805   | -1,877   | -0       | -1,259   | -1,882  | -1      | -0       |
| <b>Total remaining SNPs before merging</b>                                                   | 618,179  | 618,990  | 630,434  | 623,699  | 512,608  | 613,133  | 599,602 | 517,789 | 463,870  |
| <b>Number of overlapping SNPs after merging</b>                                              |          |          |          |          |          | 270,720  |         |         |          |
| <b>Phenotype biased</b>                                                                      |          |          |          |          |          | -15,914  |         |         |          |



|                                                                                                        |                     |
|--------------------------------------------------------------------------------------------------------|---------------------|
| <b>missingness</b><br><b>P&lt;10<sup>-3</sup></b>                                                      |                     |
| <b>Total (pre-imputation)</b>                                                                          | <b>254,806</b>      |
| <b>Imputation</b>                                                                                      | <b>39,117,127</b>   |
| <b>Post-imputation</b><br><b>QC: Excluding</b><br><b>SNPs with MAF &lt;</b><br><b>5% and R2&lt;0.8</b> | <b>- 34,103,688</b> |
| <b>Total (post-imputation)</b>                                                                         | <b>5,013,439</b>    |

†UK control dataset contained SNPs mapped to both hg18 and hg19 in the same dataset. Only SNPs on hg19 were kept, by merging with cohort 1 based on position. ‡ Files with SNPs with known mapping problems downloaded from Illumina website. Abbreviations: HRC, Haplotype Reference Consortium; HWE, Hardy-Weinberg equilibrium; MAF, minor allele frequency; QC, quality control; R2, Minimac imputation quality metric; SNP, single nucleotide polymorphism.

Table S3: Sample quality control (QC) for the discovery dataset.

Cohorts 1 to 4 represent cases genotyped on the Illumina HumanOmniExpress array in 4 different batches. Cohort 5 represents previously genotyped cases from the United Kingdom.

| Sample QC step                    | Cases                                 |          |                            |          |                               | Controls                                |        |        |       |
|-----------------------------------|---------------------------------------|----------|----------------------------|----------|-------------------------------|-----------------------------------------|--------|--------|-------|
|                                   | Cohort 1                              | Cohort 2 | Cohort 3                   | Cohort 4 | Cohort 5                      | Dutch                                   | German | French | UK    |
| Start                             | 330                                   | 514      | 83                         | 199      | 181                           | 2,262                                   | 2,148  | 856    | 2,501 |
| Sex mismatch†                     | -0                                    | -2       | -0                         | -0       | -0                            | -20                                     | -1     | -0     | -0    |
| Call rate <90%                    | -2                                    | -10      | -0                         | -0       | -0                            | -10                                     | -0     | -0     | -0    |
| Merging                           |                                       |          | 1,293                      |          |                               |                                         | 7,736  |        |       |
| Inbreeding (F  0.1 )              |                                       |          | -6                         |          |                               |                                         | -8     |        |       |
| Call rate <99%                    |                                       |          | -14                        |          |                               |                                         | -153   |        |       |
| Relatedness ( $\pi$ -hat > 0.120) |                                       |          | -8                         |          |                               |                                         | -117   |        |       |
| PCA non-european                  |                                       |          | -119                       |          |                               |                                         | -57    |        |       |
| Divide in strata                  | <b>Dutch/Belgian</b>                  |          | <b>German</b>              |          | <b>French/French-Canadian</b> | <b>UK, Australian, English-Canadian</b> |        |        |       |
|                                   | 466 cases / 2,077 controls            |          | 105 cases / 2,032 controls |          | 208 cases / 816 controls      | 367 cases / 2,476 controls              |        |        |       |
| PCA subpopulation                 | -9 cases / -16 controls               |          | -5 cases / -21 controls    |          | -2 cases / -19 controls       | -33 cases / -11 controls                |        |        |       |
| Cluster 1:3                       | -1 cases / -693 controls              |          | -0 cases / -1,711 controls |          | -2 cases / -185 controls      | -0 cases / -1,463 controls              |        |        |       |
| Merging                           | 456 cases / 1,368 controls            |          | 100 cases / 300 controls   |          | 204 cases / 612 controls      | 334 cases / 1,002 controls              |        |        |       |
| <b>Total final dataset</b>        | <b>1,094 cases and 3,282 controls</b> |          |                            |          |                               |                                         |        |        |       |

† sex information was imputed in the French control dataset. Abbreviations: F, inbreeding coefficient; IBS, Identity-by-state; PCA, principal component analysis; UK, United Kingdom.

Table S4: Meta-analysis results.

Risk loci are split into genome-wide associated loci ( $P < 5 \times 10^{-8}$ ,  $n=1$ ) and loci below suggestive significance threshold ( $P < 1 \times 10^{-5}$ ,  $n=21$ ). Start and end position of genomic risk loci represent the boundaries of the haplotype based on LD with the lead SNP ( $r^2 > 0.5$ ) and P-value ( $< 1 \times 10^{-3}$ ). For overlap with EMERGE predictive cardiac regulatory elements, the top 100.000 predicted signals genome-wide were taken. All positions are given on hg19.

| RL                                                                    | Chr   | Lead SNP    | Pos       | CA | p-value meta-analysis | OR (95% CI)      | CAF 1000GP EUR | start -end genomic risk locus (bp) | Coding SNPs in LD | Overlap with cardiac RE |
|-----------------------------------------------------------------------|-------|-------------|-----------|----|-----------------------|------------------|----------------|------------------------------------|-------------------|-------------------------|
| <b>Genome-wide locus (<math>p &lt; 5 \times 10^{-8}</math>) (n=1)</b> |       |             |           |    |                       |                  |                |                                    |                   |                         |
| RL1                                                                   | chr3  | rs36039042  | 55592479  | C  | 6,42E-10              | 0.69 (0.61-0.77) | 0,25           | 55571418 55617415                  |                   | Yes                     |
| <b>Suggestive loci (<math>p &lt; 1 \times 10^{-5}</math>) (n=21)</b>  |       |             |           |    |                       |                  |                |                                    |                   |                         |
| RL2                                                                   | chr1  | rs12746591  | 6685442   | G  | 9,73E-06              | 1.27 (1.14-1.41) | 0,70           | 6643836 6782505                    |                   | Yes                     |
| RL3                                                                   | chr1  | rs12128548  | 173264514 | C  | 2,21E-06              | 0.72 (0.63-0.83) | 0,89           | 173219602 173272713                |                   | Yes                     |
| RL4                                                                   | chr2  | rs350784    | 52934145  | C  | 8,60E-06              | 0.70 (0.59-0.82) | 0,11           | 52934145 52958094                  |                   | No                      |
| RL5                                                                   | chr4  | rs7683083   | 165737589 | C  | 5,53E-06              | 0.80 (0.73-0.88) | 0,64           | 165712962 165739658                |                   | No                      |
| RL6                                                                   | chr5  | rs706711    | 67520226  | G  | 3,09E-07              | 1.29 (1.17-1.42) | 0,58           | 67442243 67534046                  |                   | Yes                     |
| RL7                                                                   | chr5  | rs1217762   | 71330802  | G  | 8,30E-06              | 0.77 (0.66-0.89) | 0,29           | 71311789 71365208                  |                   | No                      |
| RL8                                                                   | chr6  | rs6913987   | 164178277 | C  | 9,32E-06              | 0.80 (0.72-0.88) | 0,66           | 164173155 164181368                |                   | No                      |
| RL9                                                                   | chr7  | rs113233561 | 62964737  | C  | 6,67E-06              | 3.51 (2.03-6.07) | 0,07           | 62637024 63304296                  |                   | Yes                     |
| RL10                                                                  | chr8  | rs310280    | 23618048  | G  | 5,67E-06              | 0.80 (0.73-0.88) | 0,56           | 23581584 23618048                  |                   | Yes                     |
| RL11                                                                  | chr8  | rs7008884   | 49108413  | C  | 4,30E-06              | 0.72 (0.63-0.83) | 0,87           | 49047317 49213751                  |                   | Yes                     |
| RL12                                                                  | chr8  | rs112080664 | 75051478  | C  | 2,23E-06              | 0.65 (0.55-0.78) | 0,94           | 75032562 75054341                  |                   | No                      |
| RL13                                                                  | chr9  | rs6478241   | 119252629 | G  | 6,59E-06              | 1.26 (1.14-1.39) | 0,62           | 119241165 119258583                |                   | Yes                     |
| RL14                                                                  | chr12 | rs7960745   | 47486814  | C  | 4,78E-07              | 1.29 (1.17-1.43) | 0,64           | 47466535 47486814                  |                   | Yes                     |
| RL15                                                                  | chr12 | rs1529331   | 115672311 | G  | 1,53E-06              | 0.78 (0.70-0.68) | 0,72           | 115668392 115683916                |                   | No                      |
| RL16                                                                  | chr13 | rs73543688  | 60019400  | C  | 5,64E-06              | 1.44 (1.23-1.68) | 0,07           | 60019400 60059784                  |                   | Yes                     |
| RL17                                                                  | chr14 | rs11621263  | 25095150  | C  | 7,96E-06              | 0.75 (0.66-0.85) | 0,84           | 24929715 25096469                  |                   | Yes                     |
| RL18                                                                  | chr14 | rs6573209   | 59099468  | T  | 9,07E-06              | 0.78 (0.71-0.87) | 0,76           | 59099468 59108678                  |                   | Yes                     |
| RL19                                                                  | chr14 | rs2332916   | 73183097  | C  | 6,23E-06              | 1.33 (1.17-1.50) | 0,17           | 73183097 73185929                  |                   | No                      |
| RL20                                                                  | chr14 | rs743231    | 89358280  | G  | 6,83E-06              | 0.72 (0.62-0.83) | 0,89           | 89284494 89358280                  |                   | Yes                     |

|             |       |            |          |   |          |                  |      |          |          |                                                                 |     |
|-------------|-------|------------|----------|---|----------|------------------|------|----------|----------|-----------------------------------------------------------------|-----|
| <b>RL21</b> | chr16 | rs4781730  | 16254626 | C | 8,85E-07 | 0.78 (0.70-0.86) | 0,70 | 16228242 | 16254766 | ABCC1:p.S1334S<br>(rs2230671),<br>ABCC6:p.R1268Q<br>(rs2238472) | Yes |
| <b>RL22</b> | chr16 | rs35065365 | 77485919 | C | 1,05E-07 | 1.29 (1.17-1.42) | 0,49 | 77458017 | 77578749 |                                                                 | No  |

Abbreviations: 1000GP EUR, 1000 Genome Project European subpopulation; bp, base position; CA, coded allele; CAF, coded allele frequency; Chr, Chromosome; CI, confidence interval; LD, linkage disequilibrium; OR, odds ratio; Pos, position; RE, regulatory element; RL, risk locus; SNP, single nucleotide polymorphism

Table S5: TGA meta-analysis results for variants reported in previous genome-wide association studies (GWAS) of congenital heart disease.

| SNP        | Chr | Pos       | Previously reported P-value | Phenotype      | Study                        | P-value meta-analysis TGA |
|------------|-----|-----------|-----------------------------|----------------|------------------------------|---------------------------|
| rs870142   | 4   | 4648047   | $2.6 \times 10^{-10}$       | ASD secundum   | Cordell, 2013 <sup>17</sup>  | 0.3487                    |
| rs11065987 | 12  | 112072424 | $7.6 \times 10^{-11}$       | TOF            | Cordell, 2013 <sup>18</sup>  | 0.294                     |
| rs7982677  | 13  | 92988323  | $3.1 \times 10^{-9}$        | TOF            | Cordell, 2013 <sup>18</sup>  | 0.7098                    |
| rs2474937  | 1   | 118902978 | $8.4 \times 10^{-10}$       | Septal defects | Hu, 2013 <sup>22</sup>       | 0.8971                    |
| rs1531070  | 4   | 140795327 | $5 \times 10^{-12}$         | Septal defects | Hu, 2013 <sup>22</sup>       | 0.09414                   |
| rs3746446  | 20  | 33574765  | $9.5 \times 10^{-9}$        | LSL            | Hanchard, 2016 <sup>19</sup> | 0.252                     |
| rs8061121  | 16  | 87193084  | $4 \times 10^{-9}$          | LSL            | Mitchell, 2015 <sup>20</sup> | 0.4273                    |

Positions are given on hg19. Abbreviations: ASD, atrial septal defect; Chr, chromosome; LSL, left sided lesion; Pos, position; SNP, single nucleotide polymorphism; TOF, tetralogy of Fallot

Table S6: Derivation and validation of TGA polygenic scores (PRS)

Derivation of the PRS from the TGA GWAS discovery cohort and validation in the replication cohort. Model = Pheno ~ PRS + sex. Reporting C-statistic for each of the 38 models.

| <b>Tool</b>                     | <b>Exclusions</b> | <b>Rho</b> | <b>P-value threshold</b> | <b>R2 pruning threshold</b> | <b>C-statistic</b> |
|---------------------------------|-------------------|------------|--------------------------|-----------------------------|--------------------|
| <b>Gibbs sampler (LDpred)</b>   | NA                | 1          | NA                       | NA                          | <b>0.613</b>       |
| <b>Gibbs sampler (LDpred)</b>   | NA                | 0.3        | NA                       | NA                          | <b>0.613</b>       |
| <b>Gibbs sampler (LDpred)</b>   | NA                | 0.1        | NA                       | NA                          | <b>0.614</b>       |
| <b>Gibbs sampler (LDpred)</b>   | NA                | 0.03       | NA                       | NA                          | <b>0.613</b>       |
| <b>Gibbs sampler (LDpred)</b>   | NA                | 0.01       | NA                       | NA                          | <b>0.614</b>       |
| <b>Gibbs sampler (LDpred)</b>   | NA                | 0.003      | NA                       | NA                          | <b>0.616</b>       |
| <b>Gibbs sampler (LDpred)</b>   | NA                | 0.001      | NA                       | NA                          | <b>0.62</b>        |
| <b>Gibbs sampler (LDpred)</b>   | NA                | 0.0003     | NA                       | NA                          | <b>0.626</b>       |
| <b>Gibbs sampler (LDpred)</b>   | NA                | 0.0001     | NA                       | NA                          | <b>0.616</b>       |
| <b>Gibbs sampler (LDpred)</b>   | Chromosome 3      | 1          | NA                       | NA                          | <b>0.62</b>        |
| <b>Gibbs sampler (LDpred)</b>   | Chromosome 3      | 0.3        | NA                       | NA                          | <b>0.62</b>        |
| <b>Gibbs sampler (LDpred)</b>   | Chromosome 3      | 0.1        | NA                       | NA                          | <b>0.62</b>        |
| <b>Gibbs sampler (LDpred)</b>   | Chromosome 3      | 0.03       | NA                       | NA                          | <b>0.621</b>       |
| <b>Gibbs sampler (LDpred)</b>   | Chromosome 3      | 0.01       | NA                       | NA                          | <b>0.621</b>       |
| <b>Gibbs sampler (LDpred)</b>   | Chromosome 3      | 0.003      | NA                       | NA                          | <b>0.622</b>       |
| <b>Gibbs sampler (LDpred)</b>   | Chromosome 3      | 0.001      | NA                       | NA                          | <b>0.624</b>       |
| <b>Gibbs sampler (LDpred)</b>   | Chromosome 3      | 0.0003     | NA                       | NA                          | <b>0.621</b>       |
| <b>Gibbs sampler (LDpred)</b>   | Chromosome 3      | 0.0001     | NA                       | NA                          | <b>0.613</b>       |
| <b>Pruning and Thresholding</b> | NA                | NA         | 5.00E-08                 | 0.8                         | <b>0.587</b>       |
| <b>Pruning and Thresholding</b> | NA                | NA         | 5.00E-08                 | 0.5                         | <b>0.587</b>       |
| <b>Pruning and Thresholding</b> | NA                | NA         | 5.00E-08                 | 0.2                         | <b>0.587</b>       |
| <b>Pruning and Thresholding</b> | NA                | NA         | 5.00E-08                 | 0.1                         | <b>0.587</b>       |
| <b>Pruning and Thresholding</b> | NA                | NA         | 5.00E-08                 | 0.05                        | <b>0.587</b>       |

|                                 |    |    |          |      |              |
|---------------------------------|----|----|----------|------|--------------|
| <b>Pruning and Thresholding</b> | NA | NA | 1.00E-05 | 0.8  | <b>0.61</b>  |
| <b>Pruning and Thresholding</b> | NA | NA | 1.00E-05 | 0.5  | <b>0.603</b> |
| <b>Pruning and Thresholding</b> | NA | NA | 1.00E-05 | 0.2  | <b>0.594</b> |
| <b>Pruning and Thresholding</b> | NA | NA | 1.00E-05 | 0.1  | <b>0.594</b> |
| <b>Pruning and Thresholding</b> | NA | NA | 1.00E-05 | 0.05 | <b>0.594</b> |
| <b>Pruning and Thresholding</b> | NA | NA | 1.00E-04 | 0.8  | <b>0.609</b> |
| <b>Pruning and Thresholding</b> | NA | NA | 1.00E-04 | 0.5  | <b>0.6</b>   |
| <b>Pruning and Thresholding</b> | NA | NA | 1.00E-04 | 0.2  | <b>0.595</b> |
| <b>Pruning and Thresholding</b> | NA | NA | 1.00E-04 | 0.1  | <b>0.593</b> |
| <b>Pruning and Thresholding</b> | NA | NA | 1.00E-04 | 0.05 | <b>0.59</b>  |
| <b>Pruning and Thresholding</b> | NA | NA | 1.00E-03 | 0.8  | <b>0.602</b> |
| <b>Pruning and Thresholding</b> | NA | NA | 1.00E-03 | 0.5  | <b>0.603</b> |
| <b>Pruning and Thresholding</b> | NA | NA | 1.00E-03 | 0.2  | <b>0.593</b> |
| <b>Pruning and Thresholding</b> | NA | NA | 1.00E-03 | 0.1  | <b>0.591</b> |
| <b>Pruning and Thresholding</b> | NA | NA | 1.00E-03 | 0.05 | <b>0.587</b> |

Abbreviations: NA, not applicable

Table S7: Assigned genes at GWAS loci.

Risk loci are split into genome-wide associated loci ( $P < 5 \times 10^{-8}$ ,  $n=1$ ) and loci below suggestive significance threshold ( $P < 1 \times 10^{-5}$ ,  $n=21$ ). Genes are either assigned to the risk locus by means of eQTL (expression quantitative trait locus) and/or when within the same TAD (topologically associated domain). In case of a significant eQTL association the lowest P-value is provided in any tissue. Genes linked to the mammalian and human phenotype ontology term 'abnormal heart morphology' (MP:0000266 and/or HP:0001627) are marked in the column 'cardiac morphology abnormalities in mouse and/or human' and genes listed in published curated CHD genelists<sup>46-48</sup> are marked in the column 'Published CHD genes list'. The Wnt signaling pathway is based on the Gene Ontology Term GO:0016055.

| Genome-wide locus ( $p < 5 \times 10^{-8}$ ) (n=1) |      |                |      |                  |            |                                                                                |                          |                       |
|----------------------------------------------------|------|----------------|------|------------------|------------|--------------------------------------------------------------------------------|--------------------------|-----------------------|
| RL                                                 | Chr  | Gene           | eQTL | eQTL min P-value | Within TAD | Cardiac morphology abnormalities mouse/human Human - Mouse: Disease Connection | Published CHD genes list |                       |
| RL1                                                | Chr3 | <i>WNT5A</i>   | Yes  | 3,11E-10         | Yes        | Yes                                                                            | Yes                      |                       |
| RL1                                                | Chr3 | <i>ERC2</i>    | No   | NA               | Yes        | No                                                                             | Yes                      |                       |
| Suggestive loci ( $p < 1 \times 10^{-5}$ ) (n=21)  |      |                |      |                  |            |                                                                                |                          |                       |
| RL                                                 | Chr  | Gene           | eQTL | eQTL min P-value | Within TAD | Cardiac morphology abnormalities mouse/human Human - Mouse: Disease Connection | Published CHD genes list | Wnt signaling pathway |
| RL2                                                | Chr1 | <i>PLEKHG5</i> | Yes  | 9,83E-06         | No         | Yes                                                                            | Yes                      | No                    |
| RL2                                                | Chr1 | <i>NOL9</i>    | Yes  | 5,55E-05         | Yes        | No                                                                             | Yes                      | No                    |
| RL2                                                | Chr1 | <i>ZBTB48</i>  | Yes  | 1,36E-48         | Yes        | No                                                                             | No                       | No                    |
| RL2                                                | Chr1 | <i>KLHL21</i>  | Yes  | 5,15E-08         | Yes        | No                                                                             | Yes                      | No                    |
| RL2                                                | Chr1 | <i>PHF13</i>   | Yes  | 1,55E-06         | Yes        | No                                                                             | No                       | No                    |
| RL2                                                | Chr1 | <i>THAP3</i>   | Yes  | 3,54E-52         | Yes        | No                                                                             | No                       | No                    |
| RL2                                                | Chr1 | <i>DNAJC11</i> | Yes  | 1,13E-07         | Yes        | No                                                                             | Yes                      | No                    |
| RL2                                                | Chr1 | <i>TAS1R1</i>  | No   | NA               | Yes        | No                                                                             | Yes                      | No                    |
| RL2                                                | Chr1 | <i>CAMTA1</i>  | No   | NA               | Yes        | No                                                                             | No                       | No                    |
| RL3                                                | Chr1 | <i>TNFSF4</i>  | Yes  | 1,63E-06         | Yes        | No                                                                             | No                       | No                    |
| RL3                                                | Chr1 | <i>TNFSF18</i> | No   | NA               | Yes        | No                                                                             | Yes                      | No                    |
| RL4                                                | Chr2 | <i>NRXN1</i>   | No   | NA               | Yes        | No                                                                             | Yes                      | No                    |



|             |      |                   |     |             |     |     |     |     |
|-------------|------|-------------------|-----|-------------|-----|-----|-----|-----|
| <b>RL4</b>  | Chr2 | <i>GPR75-ASB3</i> | No  | NA          | Yes | No  | No  | No  |
| <b>RL4</b>  | Chr2 | <i>ASB3</i>       | No  | NA          | Yes | No  | No  | No  |
| <b>RL4</b>  | Chr2 | <i>CHAC2</i>      | No  | NA          | Yes | No  | Yes | No  |
| <b>RL4</b>  | Chr2 | <i>ERLEC1</i>     | No  | NA          | Yes | No  | Yes | No  |
| <b>RL5</b>  | Chr4 | <i>CPE</i>        | No  | NA          | Yes | No  | No  | Yes |
| <b>RL5</b>  | Chr4 | <i>TRIM61</i>     | No  | NA          | Yes | No  | No  | No  |
| <b>RL5</b>  | Chr4 | <i>FAM218A</i>    | No  | NA          | Yes | No  | Yes | No  |
| <b>RL5</b>  | Chr4 | <i>TRIM60</i>     | No  | NA          | Yes | No  | No  | No  |
| <b>RL5</b>  | Chr4 | <i>TMEM192</i>    | No  | NA          | Yes | No  | No  | No  |
| <b>RL5</b>  | Chr4 | <i>KLHL2</i>      | No  | NA          | Yes | No  | Yes | No  |
| <b>RL5</b>  | Chr4 | <i>MSMO1</i>      | No  | NA          | Yes | No  | No  | No  |
| <b>RL6</b>  | Chr5 | <i>PIK3R1</i>     | No  | NA          | Yes | Yes | Yes | No  |
| <b>RL7</b>  | Chr5 | <i>ZNF366</i>     | Yes | 5,96E-06    | No  | Yes | No  | No  |
| <b>RL7</b>  | Chr5 | <i>PTCD2</i>      | No  | NA          | Yes | Yes | Yes | No  |
| <b>RL7</b>  | Chr5 | <i>MAP1B</i>      | No  | NA          | Yes | No  | Yes | No  |
| <b>RL7</b>  | Chr5 | <i>MRPS27</i>     | No  | NA          | Yes | No  | Yes | No  |
| <b>RL8</b>  | Chr6 | <i>QKI</i>        | Yes | 2,03E-05    | Yes | Yes | Yes | No  |
| <b>RL9</b>  | Chr7 | <i>ZNF727</i>     | No  | NA          | Yes | No  | No  | No  |
| <b>RL9</b>  | Chr7 | <i>ZNF679</i>     | No  | NA          | Yes | No  | No  | No  |
| <b>RL9</b>  | Chr7 | <i>ZNF736</i>     | No  | NA          | Yes | No  | No  | No  |
| <b>RL9</b>  | Chr7 | <i>ZNF680</i>     | No  | NA          | Yes | No  | No  | No  |
| <b>RL9</b>  | Chr7 | <i>ZNF107</i>     | No  | NA          | Yes | No  | No  | No  |
| <b>RL9</b>  | Chr7 | <i>ZNF138</i>     | Yes | 0,000245777 | No  | No  | Yes | No  |
| <b>RL10</b> | Chr8 | <i>NKX3-1</i>     | No  | NA          | Yes | No  | No  | No  |
| <b>RL10</b> | Chr8 | <i>NKX2-6</i>     | No  | NA          | Yes | Yes | Yes | No  |
| <b>RL10</b> | Chr8 | <i>SLC25A37</i>   | No  | NA          | Yes | No  | Yes | No  |
| <b>RL10</b> | Chr8 | <i>STC1</i>       | No  | NA          | Yes | No  | No  | No  |
| <b>RL10</b> | Chr8 | <i>ADAM28</i>     | No  | NA          | Yes | No  | Yes | No  |
| <b>RL10</b> | Chr8 | <i>ADAMDEC1</i>   | No  | NA          | Yes | No  | Yes | No  |

|      |       |                |     |             |     |     |     |     |
|------|-------|----------------|-----|-------------|-----|-----|-----|-----|
| RL11 | Chr8  | <i>PRKDC</i>   | No  | NA          | Yes | No  | No  | No  |
| RL11 | Chr8  | <i>MCM4</i>    | Yes | 1,04E-05    | Yes | Yes | Yes | No  |
| RL11 | Chr8  | <i>EFCAB1</i>  | No  | NA          | Yes | Yes | Yes | No  |
| RL11 | Chr8  | <i>SNAI2</i>   | No  | NA          | Yes | Yes | No  | Yes |
| RL11 | Chr8  | <i>UBE2V2</i>  | Yes | 6,86E-05    | Yes | No  | No  | No  |
| RL12 | Chr8  | <i>TMEM70</i>  | No  | NA          | Yes | Yes | Yes | No  |
| RL12 | Chr8  | <i>GDAP1</i>   | No  | NA          | Yes | Yes | Yes | No  |
| RL12 | Chr8  | <i>STAU2</i>   | No  | NA          | Yes | No  | Yes | No  |
| RL12 | Chr8  | <i>UBE2W</i>   | No  | NA          | Yes | No  | No  | No  |
| RL12 | Chr8  | <i>TCEB1</i>   | No  | NA          | Yes | No  | No  | No  |
| RL12 | Chr8  | <i>LY96</i>    | No  | NA          | Yes | No  | No  | No  |
| RL12 | Chr8  | <i>JPH1</i>    | No  | NA          | Yes | No  | No  | No  |
| RL13 | Chr9  | <i>TRIM32</i>  | Yes | 8,51E-09    | No  | No  | Yes | No  |
| RL13 | Chr9  | <i>PAPPA</i>   | No  | NA          | Yes | No  | No  | No  |
| RL13 | Chr9  | <i>ASTN2</i>   | No  | NA          | Yes | No  | Yes | No  |
| RL14 | Chr12 | <i>AMIGO2</i>  | Yes | 2,23E-50    | Yes | No  | Yes | No  |
| RL14 | Chr12 | <i>PCED1B</i>  | Yes | 1,09E-08    | Yes | No  | No  | No  |
| RL14 | Chr12 | <i>RPAP3</i>   | No  | NA          | Yes | No  | Yes | No  |
| RL15 | Chr12 | <i>TBX3</i>    | No  | NA          | Yes | Yes | Yes | No  |
| RL15 | Chr12 | <i>MED13L</i>  | No  | NA          | Yes | Yes | Yes | No  |
| RL16 | Chr13 | <i>DIAPH3</i>  | No  | NA          | Yes | Yes | Yes | No  |
| RL16 | Chr13 | <i>PCDH17</i>  | No  | NA          | Yes | No  | No  | No  |
| RL17 | Chr14 | <i>DHRS2</i>   | Yes | 1,16E-05    | No  | No  | No  | No  |
| RL17 | Chr14 | <i>CBLN3</i>   | Yes | 0,000156948 | No  | No  | No  | No  |
| RL17 | Chr14 | <i>KHNYN</i>   | Yes | 5,82E-10    | No  | No  | Yes | No  |
| RL17 | Chr14 | <i>SDR39U1</i> | Yes | 1,13E-09    | No  | No  | Yes | No  |
| RL17 | Chr14 | <i>CMA1</i>    | No  | NA          | Yes | No  | Yes | No  |
| RL17 | Chr14 | <i>CTSG</i>    | No  | NA          | Yes | No  | Yes | No  |
| RL17 | Chr14 | <i>GZMH</i>    | No  | NA          | Yes | No  | Yes | No  |

|             |       |                 |     |          |     |     |     |     |
|-------------|-------|-----------------|-----|----------|-----|-----|-----|-----|
| <b>RL17</b> | Chr14 | <i>GZMB</i>     | No  | NA       | Yes | No  | Yes | No  |
| <b>RL17</b> | Chr14 | <i>STXBP6</i>   | No  | NA       | Yes | No  | Yes | No  |
| <b>RL18</b> | Chr14 | <i>KIAA0586</i> | no  | NA       | Yes | Yes | Yes | No  |
| <b>RL18</b> | Chr14 | <i>C14orf37</i> | no  | NA       | Yes | No  | No  | No  |
| <b>RL18</b> | Chr14 | <i>ARID4A</i>   | no  | NA       | Yes | No  | Yes | No  |
| <b>RL18</b> | Chr14 | <i>TOMM20L</i>  | no  | NA       | Yes | No  | No  | No  |
| <b>RL18</b> | Chr14 | <i>TIMM9</i>    | no  | NA       | Yes | No  | No  | No  |
| <b>RL18</b> | Chr14 | <i>DACT1</i>    | no  | NA       | Yes | No  | Yes | Yes |
| <b>RL19</b> | Chr14 | <i>RGS6</i>     | No  | NA       | Yes | No  | No  | No  |
| <b>RL19</b> | Chr14 | <i>DPF3</i>     | No  | NA       | Yes | No  | No  | No  |
| <b>RL19</b> | Chr14 | <i>DCAF4</i>    | No  | NA       | Yes | No  | Yes | No  |
| <b>RL19</b> | Chr14 | <i>ZFYVE1</i>   | No  | NA       | Yes | No  | Yes | No  |
| <b>RL20</b> | Chr14 | <i>SPATA7</i>   | Yes | 4,42E-06 | No  | No  | Yes | No  |
| <b>RL20</b> | Chr14 | <i>TTC8</i>     | Yes | 1,03E-09 | Yes | Yes | Yes | No  |
| <b>RL20</b> | Chr14 | <i>EML5</i>     | No  | NA       | Yes | No  | Yes | No  |
| <b>RL21</b> | Chr16 | <i>NDE1</i>     | No  | NA       | Yes | No  | No  | No  |
| <b>RL21</b> | Chr16 | <i>FOPNL</i>    | No  | NA       | Yes | No  | No  | No  |
| <b>RL21</b> | Chr16 | <i>ABCC6</i>    | Yes | 3,63E-08 | Yes | Yes | Yes | No  |
| <b>RL21</b> | Chr16 | <i>MYH11</i>    | No  | NA       | Yes | Yes | Yes | No  |
| <b>RL21</b> | Chr16 | <i>ABCC1</i>    | Yes | 7,40E-08 | Yes | No  | No  | No  |
| <b>RL21</b> | Chr16 | <i>NOMO3</i>    | Yes | 3,54E-08 | No  | No  | No  | No  |
| <b>RL22</b> | Chr16 | <i>ADAMTS18</i> | Yes | 1,70E-09 | Yes | No  | Yes | No  |
| <b>RL22</b> | Chr16 | <i>SYCE1L</i>   | Yes | 1,67E-05 | Yes | No  | Yes | No  |

Abbreviations: CHD, congenital heart defect; Chr, chromosome; eQTL, expression quantitative trait locus; GTEx, genotype tissue expression dataset; RL, risk locus; TAD, topologically associated domain

Table S8: Phenotype description of assigned genes associated to abnormal cardiac morphology (MP:0000266/HP:0001627).

Mouse phenotypes were extracted primarily from the Mouse Genome Informatics (MGI) database and relevant MGI genotype IDs are provided. Human phenotypes were extracted primarily from Online Mendelian Inheritance in Man (OMIM) and relevant OMIM phenotype IDs are provided. Genes are sorted by chromosome.

| Chr  | Gene           | Mouse phenotype                                                                                                                                                                                                                                                                                                                                                                                                                                                                                     | MGI genotype ID             | Human syndromes/diseases                                                 | Reported cardiac features human | OMIM phenotype ID           |
|------|----------------|-----------------------------------------------------------------------------------------------------------------------------------------------------------------------------------------------------------------------------------------------------------------------------------------------------------------------------------------------------------------------------------------------------------------------------------------------------------------------------------------------------|-----------------------------|--------------------------------------------------------------------------|---------------------------------|-----------------------------|
| Chr1 | <i>PLEKHG5</i> | KO mice display angiogenic defects that affect multiple organs, including abnormal coronary vessel morphology. Conditional knock-out mice (endothelial cell specific) show abnormal left ventricle morphology.                                                                                                                                                                                                                                                                                      | MGI:4414822;<br>MGI:5484864 | Distal spinal muscular atrophy (AR);<br>Charcot-Marie-Tooth disease (AR) |                                 | OMIM:611067;<br>OMIM:615376 |
| Chr3 | <i>WNT5A</i>   | KO mice die perinatally due to multiple defects, affecting mainly structures whose development requires extension from the primary body axis. Cardiac abnormalities consist of outflow tract defects (persistent truncus arteriosus and transposition of the great arteries). ENU-induced homozygous mutant mice also show outflow tract defects (persistent truncus arteriosus, double outlet right ventricle, atrioventricular septal defect) and craniofacial abnormalities (e.g. cleft palate). | MGI:2653626;<br>MGI:5648028 | Robinow syndrome (AD)                                                    |                                 | OMIM:180700                 |

|             |               |                                                                                                                                                                                                                                                                    |                                                             |                                                                     |                                 |                                              |
|-------------|---------------|--------------------------------------------------------------------------------------------------------------------------------------------------------------------------------------------------------------------------------------------------------------------|-------------------------------------------------------------|---------------------------------------------------------------------|---------------------------------|----------------------------------------------|
| <b>Chr5</b> | <i>PIK3R1</i> | KO mice exhibit perinatal lethality associated with hepatic necrosis, chylous ascites, enlarged muscle fibers, calcification of cardiac tissue, and hypoglycemia.                                                                                                  | MGI:4940203                                                 | Agammaglobulinemia (AR); Immunodeficiency (AD); Short syndrome (AD) |                                 | OMIM: 615214;<br>OMIM:616005;<br>OMIM:269880 |
| <b>Chr5</b> | <i>ZNF366</i> | No KO mice. ENU-induced homozygous mutant mice exhibit perimembranous and muscular ventricular septal defects, and overriding aorta. Short snout, micrognathia, microphthalmia, hypoplastic thymus, and hydronephrosis are also observed.                          | MGI:5645264                                                 |                                                                     |                                 |                                              |
| <b>Chr5</b> | <i>PTCD2</i>  | No KO mice. Mice homozygous for a gene trapped allele exhibit abnormal mitochondrial morphology and physiology, especially in the heart, liver, skeletal muscle and kidney. Cardiac abnormalities include abnormal ventricular morphology (thin ventricular wall). | MGI:3830812                                                 |                                                                     |                                 |                                              |
| <b>Chr6</b> | <i>QKI</i>    | KO and ENU-induced homozygous mutant mice die in utero (E8.5-E11) with defects in embryo turning, blood vessel, smooth muscle, cardiac and neural tube development. Cardiac abnormalities include abnormal cardiac looping.                                        | MGI:3720798;<br>MGI:5639298;<br>MGI:3790089;<br>MGI:3033873 |                                                                     |                                 |                                              |
| <b>Chr8</b> | <i>NKX2-6</i> | KO mice are viable and fertile and develop normally, with no anomalies detected in the heart.                                                                                                                                                                      | MGI:3608503                                                 | Conotruncal heart malformations                                     | Conotruncal heart malformations | OMIM:217095                                  |

|             |               |                                                                                                                                                                                                                                                                                                                                                                                  |             |                                                                        |                                                         |
|-------------|---------------|----------------------------------------------------------------------------------------------------------------------------------------------------------------------------------------------------------------------------------------------------------------------------------------------------------------------------------------------------------------------------------|-------------|------------------------------------------------------------------------|---------------------------------------------------------|
| <b>Chr8</b> | <i>EFCAB1</i> | KO mice show partial lethality during fetal growth and development (>E14), hydrocephaly, situs inversus, enlarged brain ventricles, cardiac hypertrophy, reduced motility and fluid flows in sperm flagella and epithelial cilia, and defects in nodal cilia formation and motility. Embryonic lethality likely due to cardiac defects associated to primary ciliary dyskinesia. | MGI:6358382 |                                                                        |                                                         |
| <b>Chr8</b> | <i>MCM4</i>   | Assessment mice by International Mouse Phenotyping Consortium. Mice heterozygous for a null allele have cardiovascular abnormalities: abnormal pericardium morphology                                                                                                                                                                                                            | MGI:5797650 |                                                                        |                                                         |
| <b>Chr8</b> | <i>SNAI2</i>  | KO mice display abnormal fetal atrioventricular canal morphology (decreased atrioventricular cushion size)                                                                                                                                                                                                                                                                       | MGI:5649252 | Waardenburg syndrome, Type IID (AR); Piebaldism (AD)                   | OMIM:608890;<br>OMIM:172800                             |
| <b>Chr8</b> | <i>TMEM70</i> | KO mice exhibit complete embryonic lethality (E9.5) during organogenesis associated with severe growth delay, impaired biosynthesis and assembly of ATP synthase, decreased ATP production, oxidative stress, delayed heart development, and altered mitochondrial ultrastructure.                                                                                               | MGI:5904753 | Mitochondrial complex V (ATP synthase) deficiency, nuclear type 2 (AR) | OMIM:614052                                             |
| <b>Chr8</b> | <i>GDAP1</i>  | Assessment KO mice by International Mouse Phenotyping Consortium. Cardiovascular abnormalities: enlarged heart                                                                                                                                                                                                                                                                   | MGI:6262509 | Charcot-Marie-Tooth disease, different types (AR/AD)                   | OMIM:607831;<br>OMIM:607706;<br>OMIM:608340;OMIM:214400 |

|              |                 |                                                                                                                                                                                                                                                                                                                                                                                                                              |                                                                                             |                                                                                                                                      |                                                                      |                             |
|--------------|-----------------|------------------------------------------------------------------------------------------------------------------------------------------------------------------------------------------------------------------------------------------------------------------------------------------------------------------------------------------------------------------------------------------------------------------------------|---------------------------------------------------------------------------------------------|--------------------------------------------------------------------------------------------------------------------------------------|----------------------------------------------------------------------|-----------------------------|
| <b>Chr12</b> | <i>TBX3</i>     | KO mice die embryonically <E16.5 and exhibit yolk sac degeneration, lack of mammary glands and limb defects. KO mice exhibit delayed and improper heart looping and outflow tract defects (double outlet right ventricle).<br>Most mice homozygous for hypomorphic alleles survive until birth and show in approximately 25% structural cardiac abnormalities, including ventricular septal defects and tetralogy of fallot. | MGI:2655216;<br>MGI:3813724;<br>MGI:3769511;<br>MGI:5538600;<br>MGI:5538604;<br>MGI:5538603 | Ulnar-mammary syndrome (AR)                                                                                                          | Ventricular septal defect                                            | OMIM: 181450                |
| <b>Chr12</b> | <i>MED13L</i>   | No KO mice                                                                                                                                                                                                                                                                                                                                                                                                                   |                                                                                             | Mental retardation and distinctive facial features with or without cardiac defects (AD);<br>Transposition of the great arteries (AD) | Conotruncal heart malformations, transposition of the great arteries | OMIM:616789;<br>OMIM:608808 |
| <b>Chr13</b> | <i>DIAPH3</i>   | Assesment KO mice by International Mouse Phenotyping Consortium.<br>Cardiovascular abnormalities: abnormal pericardium morphology                                                                                                                                                                                                                                                                                            | MGI:5756991                                                                                 | Auditory neuropathy (AD)                                                                                                             |                                                                      | OMIM:609129                 |
| <b>Chr14</b> | <i>KIAA0586</i> | KO mice die during organogenesis (E10.5), lack cilia, and show randomized left-right patterning (including abnormal direction of cardiac looping), face and neural tube defects, pericardial edema and hemorrhages.                                                                                                                                                                                                          | MGI:5287589                                                                                 | Ciliopathies: Joubert syndrome (AR) and Short-rib Thoracic Dysplasia With Polydactyly (AR)                                           | Atrial septal defect                                                 | OMIM:616546;<br>OMIM:616490 |
| <b>Chr14</b> | <i>TTC8</i>     | KO mice show perturbed olfactory function due to loss of cilia from the olfactory epithelium, partial postnatal                                                                                                                                                                                                                                                                                                              | MGI:5140726                                                                                 | Ciliopathy: Bardet-Biedl syndrome (AR);<br>Retinitis pigmentosa                                                                      | Situs inversus                                                       | OMIM:615985;<br>OMIM:613464 |

|              |              |                                                                                                                                                                                                                                                                    |                             |                                        |                                                 |              |
|--------------|--------------|--------------------------------------------------------------------------------------------------------------------------------------------------------------------------------------------------------------------------------------------------------------------|-----------------------------|----------------------------------------|-------------------------------------------------|--------------|
|              |              | lethality, age related obesity, retinal degeneration and renal tube dilatation. No cardiovascular abnormalities.                                                                                                                                                   |                             | (AR)                                   |                                                 |              |
| <b>Chr16</b> | <i>ABCC6</i> | The Abcc6 gene locus has been implicated as a main mediator of dystrophic cardiac calcinosis in certain mouse strains. KO mice have calcified arteries.                                                                                                            | MGI:2175567;<br>MGI:3615174 | Pseudoxanthoma elasticum (AD)          |                                                 | OMIM:177850  |
| <b>Chr16</b> | <i>MYH11</i> | KO mice have impaired smooth muscle contractility, leading to dilative cardiomyopathy and the inability to urinate. They also display ductus arteriosus closure. They are growth retarded and die in the first few days after birth probably due to renal failure. | MGI:2656497                 | Familial thoracic aortic aneurysm (AD) | Bicuspid aortic valve, patent ductus arteriosus | OMIM: 132900 |

Abbreviations: AD, autosomal dominant; AR, autosomal recessive; Chr, chromosome; E, embryonic day; ENU, N-ethyl-N-nitrosourea; KO, knock-out; MGI,

Mouse Genome Informatics; OMIM, Online Mendelian Inheritance in Man



Table S9: Statistical details for hypothesis testing

| Figure panel | Dataset                                          | Normalization procedure         | Group 1     | N    | Group 2              | N    | Group 3     | N | Test for Normality | Comparison                 | Statistical test                             | Software                        |
|--------------|--------------------------------------------------|---------------------------------|-------------|------|----------------------|------|-------------|---|--------------------|----------------------------|----------------------------------------------|---------------------------------|
| 1A           | Case-control GWAS discovery set all Main D-TGA   | n/a                             | Cases       | 1094 | Controls             | 3282 |             |   | n/a                | Cases to controls          | Logistic regression                          | PLINK 1.9                       |
| None         | Case-control GWAS replication set all Main D-TGA | n/a                             | Cases       | 143  | Controls             | 429  |             |   | n/a                | Cases to controls          | Logistic regression                          | PLINK 1.9                       |
| 1B           | Case-control GWAS meta-analysis all Main D-TGA   | n/a                             | Cases       | 1237 | Controls             | 3711 |             |   | n/a                | Cases to controls          | inverse variance weighted fixed effect model | METAL                           |
| None         | Polygenic risk score                             | n/a                             | Cases       | 143  | Controls             | 429  |             |   | n/a                | Cases to controls          | Logistic regression                          | R                               |
| 3E           | mRNA E11.5 FACS sorted cardiomyocytes            | Quantile normalized using limma | WT          | 4    | Tbx20 <sup>-/-</sup> | 4    |             |   | limma              | WT to Tbx20 <sup>-/-</sup> | Differential expression analysis using limma | limma software package (3.26.8) |
| 4B           | Haplotype luciferase analysis HL1 cells          | None                            | Haplotype 1 | 4    | Haplotype 2          | 8    | Haplotype 3 | 4 | Shapiro-Wilk Test  | All to All                 | one-way ANOVA                                | Excel                           |
| S5A          | Case-control GWAS meta-analysis all Simple D-TGA | n/a                             | Cases       | 841  | Controls             | 2523 |             |   | n/a                | Cases to controls          | inverse variance weighted fixed effect       | METAL                           |

|     |                                                   |                                     |       |      |          |      |         |     |                   |                                                              | model                                   |
|-----|---------------------------------------------------|-------------------------------------|-------|------|----------|------|---------|-----|-------------------|--------------------------------------------------------------|-----------------------------------------|
| S5B | Case-control GWAS meta-analysis all Complex D-TGA | n/a                                 | Cases | 396  | Controls | 1188 |         | n/a | Cases to controls | inverse variance weighted fixed effect model                 | METAL                                   |
| S6  | SNP-heritability discovery set all Main D-TGA     | n/a                                 | Cases | 1092 | Controls | 3260 |         | n/a | Cases to controls | phenotype correlation-genotype correlation (PCGC) regression | LDAK                                    |
|     | SNP-heritability discovery set Dutch Main D-TGA   | n/a                                 | Cases | 455  | Controls | 1348 |         | n/a | Cases to controls | phenotype correlation-genotype correlation (PCGC) regression | LDAK                                    |
| S8C | mRNA E9.5 heart RE1A                              | Normalized to WT within each litter | WT    | 9    | RE1A-/-  | 10   |         |     | Shapiro-Wilk Test | All to all                                                   | Kruskal-Wallis test<br>Prism Graphpad 9 |
| S8D | mRNA E9.5 heart RE1C                              | Normalized to WT within each litter | WT    | 5    | RE1B-/-  | 5    |         |     | Shapiro-Wilk Test | All to all                                                   | Welch's ANOVA test<br>Prism Graphpad 9  |
| S8E | R1A Mendelian ratio                               | None                                | WT    | 20   | RE1A+/-  | 40   | RE1A-/- | 18  | None              | All to all                                                   | Chi square<br>Prism Graphpad 9          |
|     | R1C Mendelian ratio                               | None                                | WT    | 12   | RE1C+/-  | 25   | RE1C-/- | 14  | None              | All to all                                                   | Chi square<br>Prism Graphpad 9          |
